# Supplementary material for: Investigating the relationships between unfavourable habitual sleep and metabolomic traits: evidence from multi-cohort multivariable regression and Mendelian randomization analyses
Source: BMC Med. 2021 Mar 18;19:69. doi: 10.1186/s12916-021-01939-0 (PMC7971964; doi:10.1186/s12916-021-01939-0)
Supplement: Supplementary file 1 — Additional file 1: Table S1. Characteristics of the study populations in the multivariable-adjusted regression analyses. Table S2. Genetic instruments for insomnia. Table S3. Genetic instruments for total sleep duration. Table S4. Genetic instruments for short sleep duration. Table S5. Genetic instruments for long sleep duration. Table S6. Genetic instruments for chronotype. Table S7. Multivariable-adjusted results for insomnia symptoms. Table S8. Mendelian Randomization results for insomnia symptoms. Table S9. Multivariable-adjusted results for total sleep duration. Table S10. Mendelian Randomization results for total sleep duration. Table S11. Multivariable-adjusted results for short sleep duration. Table S12. Mendelian Randomization results for short sleep duration. Table S13. Multivariable-adjusted results for long sleep duration. Table S14. Mendelian Randomization results for long sleep duration. Table S15. Multivariable-adjusted results for chronotype. Table S16. Mendelian Randomization results for chronotype. [file 12916_2021_1939_MOESM1_ESM.xlsx]

## Sheet: Table S1
Table S1: Characteristics of the study populations in the multivariable-adjusted regression analyses
	AGO		HELIUS		HOF		LUMINA		NEO		NESDA		NTR		RS1		RS2		RS3
	Mean/proportion	SD	Mean/proportion	SD	Mean/proportion	SD	Mean/proportion	SD	Mean/proportion	SD	Mean/proportion	SD	Mean/proportion	SD	Mean/proportion	SD	Mean/proportion	SD	Mean/proportion	SD
N	221		458		804		245		5094		2483		3400		2496		520		1647
Age	64.72	2.91	53.18	8.01	58.02	3.83	43.21	12.75	55.61	6.01	42.1	13.4	40.7	13.6	74.91	6.09	71.23	4.56	61.78	5.63
Sex	0.593		0.4168		0.4387		0.379		0.463		32.2		66.3		41.3		44.2		40.3
Body mass index, kg/m2	28.94	4.73	30.31	4.99	27.37	4.43	23.72	2.62	29.58	4.75	25.4	4.8	24.6	3.9	27.24	4.05	27.61	4.12	27.27	4.31
Lipid-lowering drugs	NA		0.2645		10.19		0.0161		0.108		5.7		4.2		21.2		29.9		23.3
Sleep medication	1.5		0.002		8.67		0		0.056		2.6		5.2		2.1		1		3
Sleep duration	7.07	1.21	6.53	1.46	6.97	1.13	6.94	1.16	6.93	1.08	7.24	1.25	7.9	1	6.82	1.29	7.01	1.27	6.89	1.18
Sleep quality (bad)	0.398		NA		48.7		0.2056		0.158		28.2		31.1		13		12		12.9
Chronotype (evening person)	NA		NA		NA		0.4476		NA		40.5						6.9		11.7
Insomnia symptoms	NA		NA		35.61		0.3226		NA		53.5		6.6		38.5		29		30.2

## Sheet: Table S2
Table S2: Genetic instruments for insomnia
SNP	A1	A2	OR	SE	P	EAF
rs113851554	T	G	1.229	0.014	1.56e-51	0.0506
rs62149809	A	G	1.159	0.025	5.71e-09	0.986
rs1064939	A	T	1.139	0.02	2.16e-10	0.9784
rs79204944	A	G	1.082	0.014	4.24e-08	0.0449
rs72899452	T	C	1.077	0.012	1e-09	0.0648
rs55972276	A	C	1.076	0.009	4.19e-17	0.1366
rs77641763	T	C	1.074	0.009	6.53e-15	0.122
rs138014720	A	T	1.072	0.013	3.46e-08	0.9406
rs2286729	A	G	1.072	0.011	5.37e-11	0.0862
rs118166957	T	C	1.07	0.008	1.95e-16	0.1591
rs11650304	C	G	1.069	0.012	1.23e-08	0.9308
rs62158170	A	G	1.068	0.007	1.2e-19	0.7856
rs62264767	A	C	1.067	0.008	1.63e-14	0.8531
rs7168238	C	G	1.066	0.011	1.8e-08	0.0743
rs699844	A	G	1.062	0.011	4.11e-08	0.9195
rs7566062	T	C	1.061	0.007	1.37e-16	0.2248
rs28611339	T	G	1.06	0.009	8.46e-11	0.1282
rs1015438	A	G	1.06	0.008	2.51e-14	0.1882
rs6465151	T	C	1.058	0.009	1.9e-09	0.1134
rs2815757	T	C	1.057	0.008	2.24e-13	0.8089
rs16903122	T	C	1.057	0.007	9.04e-16	0.2487
rs2792990	C	G	1.056	0.008	1.15e-10	0.8553
rs62590551	A	G	1.056	0.01	4.61e-09	0.9029
rs34490907	C	G	1.055	0.009	1.76e-08	0.8878
rs670501	T	C	1.054	0.007	7.4e-13	0.2133
rs1927902	T	C	1.054	0.007	1.15e-14	0.2542
rs1620977	A	G	1.053	0.007	2.27e-14	0.2696
rs75452188	A	G	1.053	0.009	1.58e-08	0.878
rs71575448	A	G	1.052	0.009	3.38e-09	0.8602
rs11756035	C	G	1.052	0.009	1.29e-08	0.1281
rs62429521	A	C	1.052	0.008	1.78e-09	0.1456
rs7992992	A	G	1.052	0.009	1.15e-08	0.1286
rs908668	T	C	1.051	0.007	1.41e-11	0.2081
rs2491124	T	C	1.05	0.006	8.81e-16	0.5758
rs35322724	A	C	1.05	0.006	3.75e-16	0.5774
rs62068188	T	C	1.05	0.008	1.18e-09	0.8339
rs9931543	T	C	1.049	0.007	1.11e-12	0.7359
rs3902952	T	C	1.049	0.008	2.55e-10	0.1881
rs4790076	T	C	1.049	0.008	1.76e-09	0.1742
rs45453598	A	T	1.048	0.008	4.42e-09	0.169
rs17223714	A	G	1.047	0.007	2.44e-10	0.7885
rs9316619	T	C	1.047	0.008	5.5e-09	0.8249
rs429358	T	C	1.047	0.008	2.13e-08	0.8458
rs12310246	A	G	1.046	0.007	4.74e-11	0.2489
rs830716	C	G	1.046	0.007	8.68e-12	0.7133
rs67501351	C	G	1.046	0.007	5.36e-11	0.7451
rs34214423	A	C	1.046	0.008	3.18e-09	0.8087
rs12614369	A	G	1.045	0.008	7.21e-09	0.8158
rs116466468	T	C	1.045	0.007	2.11e-10	0.7593
rs2903385	A	G	1.044	0.006	4.53e-13	0.4844
rs6606731	A	T	1.044	0.008	1.51e-08	0.1923
rs742760	A	T	1.044	0.008	2.48e-08	0.8155
rs10800992	T	C	1.043	0.006	3.84e-12	0.4431
rs55772859	A	C	1.043	0.006	4.82e-11	0.3106
rs10865954	T	C	1.043	0.006	1.92e-11	0.3344
rs17005118	A	G	1.043	0.007	6.13e-10	0.264
rs35539975	A	G	1.043	0.007	4.49e-09	0.7785
rs12666306	A	G	1.043	0.006	2.24e-12	0.5017
rs2867690	T	C	1.043	0.008	3.7e-08	0.1819
rs12030482	A	T	1.042	0.007	8.16e-09	0.2201
rs17025198	A	G	1.042	0.007	2.19e-08	0.2043
rs56133505	A	G	1.042	0.006	5.59e-12	0.5369
rs7486418	T	G	1.042	0.006	6.84e-11	0.657
rs715338	A	G	1.042	0.006	7.85e-12	0.5776
rs4643373	T	C	1.042	0.007	1.58e-10	0.7006
rs56097173	T	C	1.041	0.006	2.69e-10	0.6808
rs12991815	C	G	1.041	0.006	3.02e-11	0.4241
rs12187443	T	C	1.041	0.006	1.64e-10	0.6681
rs9373590	A	T	1.041	0.006	2.18e-11	0.5078
rs4592425	T	G	1.041	0.006	4.31e-10	0.6965
rs11149313	A	G	1.041	0.007	2.38e-09	0.7297
rs6019663	T	C	1.041	0.007	6.47e-10	0.293
rs62194948	C	G	1.04	0.007	4.64e-09	0.275
rs6808140	T	C	1.04	0.006	5.35e-11	0.5053
rs35110063	A	G	1.04	0.006	8.82e-11	0.4266
rs1147852	A	G	1.04	0.006	9.94e-10	0.3095
rs324017	A	C	1.04	0.007	1.61e-09	0.294
rs6562066	T	C	1.04	0.006	1.38e-10	0.3688
rs1038093	T	C	1.04	0.006	2.47e-10	0.6282
rs11090039	A	G	1.04	0.007	1.82e-09	0.2871
rs1861412	A	G	1.039	0.006	1.67e-10	0.4338
rs6888135	A	C	1.039	0.006	1.21e-10	0.4965
rs940780	T	C	1.039	0.006	8.5e-10	0.3588
rs12924275	T	C	1.039	0.007	1.93e-08	0.268
rs2398144	A	C	1.039	0.006	5.09e-10	0.3947
rs11679943	A	G	1.038	0.006	3.16e-09	0.3471
rs6756610	C	G	1.038	0.006	1.14e-09	0.6291
rs62213452	T	G	1.038	0.007	2.39e-08	0.2788
rs7040224	A	G	1.038	0.006	4.24e-09	0.3161
rs72773790	T	C	1.038	0.006	3.71e-09	0.6732
rs5877	T	C	1.037	0.006	1.23e-08	0.6691
rs1530938	A	G	1.037	0.006	8.82e-10	0.4423
rs7625896	A	G	1.037	0.006	5.28e-09	0.6545
rs1264419	C	G	1.037	0.006	8.91e-10	0.5128
rs2737240	A	G	1.037	0.007	3.37e-08	0.7076
rs10756571	T	C	1.037	0.006	1.8e-08	0.6853
rs2221119	C	G	1.037	0.006	2e-09	0.443
rs9540729	A	T	1.037	0.006	1.4e-09	0.4794
rs34967082	A	G	1.036	0.006	4.34e-09	0.4136
rs2216427	C	G	1.036	0.006	1.6e-08	0.6527
rs6601080	A	G	1.036	0.006	2.21e-08	0.6762
rs2598293	T	C	1.036	0.006	2.48e-09	0.4763
rs871994	A	C	1.036	0.006	5.5e-09	0.4352
rs1167132	T	C	1.036	0.006	8.73e-09	0.3917
rs176644	T	G	1.036	0.006	9.49e-09	0.4036
rs12605642	T	G	1.036	0.006	2.13e-09	0.4864
rs9964420	A	C	1.036	0.007	4.54e-08	0.301
rs72820274	A	G	1.035	0.006	1.28e-08	0.417
rs10928256	T	C	1.035	0.006	1.61e-08	0.4192
rs4260410	T	C	1.035	0.006	4.87e-08	0.332
rs11722569	T	C	1.035	0.006	2.91e-08	0.6586
rs13138995	A	G	1.035	0.006	1.97e-08	0.3896
rs6978112	T	C	1.035	0.006	2.11e-08	0.4105
rs2030672	C	G	1.035	0.006	1.1e-08	0.5589
rs874168	T	C	1.035	0.006	7.95e-09	0.5254
rs10898940	A	C	1.035	0.006	8.09e-09	0.5173
rs1567084	A	G	1.034	0.006	2.14e-08	0.4981
rs1580173	A	G	1.034	0.006	2.28e-08	0.5608
rs1357685	T	C	1.034	0.006	1.39e-08	0.4735
rs4588900	A	G	1.034	0.006	1.57e-08	0.5164
rs28552587	A	G	1.034	0.006	3.3e-08	0.5641
rs10955647	T	G	1.034	0.006	1.84e-08	0.5321
rs6597649	T	C	1.034	0.006	3.05e-08	0.3994
rs10825503	T	G	1.034	0.006	1.43e-08	0.4873
rs667730	T	C	1.034	0.006	2.26e-08	0.5788
rs647905	T	C	1.034	0.006	2.87e-08	0.5409
rs10947987	T	C	0.968	0.006	4.08e-08	0.4431
rs4858708	A	T	0.967	0.006	1.23e-08	0.5305
rs2364921	T	C	0.967	0.006	2.13e-08	0.4691
rs238869	T	C	0.967	0.006	3.36e-08	0.6229
rs190073	A	G	0.967	0.006	2.86e-08	0.4141
rs9563886	T	C	0.967	0.006	3.08e-08	0.6063
rs2447094	A	C	0.967	0.006	2.5e-08	0.4687
rs1553754	T	G	0.967	0.006	3.51e-08	0.5621
rs11588755	A	G	0.966	0.006	5.14e-09	0.522
rs11119409	T	C	0.966	0.006	1.19e-08	0.5866
rs728017	A	G	0.966	0.006	9.51e-09	0.3864
rs1731951	A	T	0.966	0.006	1.36e-08	0.4434
rs4788203	A	G	0.966	0.006	6.32e-09	0.4334
rs12454003	C	G	0.966	0.006	4.94e-09	0.4821
rs910187	A	G	0.966	0.006	1.63e-08	0.373
rs34036083	T	C	0.965	0.006	2.07e-08	0.6576
rs12520974	T	C	0.965	0.006	1.69e-09	0.4846
rs701394	A	G	0.965	0.006	6.83e-09	0.6376
rs37445	A	G	0.965	0.006	4.88e-09	0.3905
rs17367725	T	C	0.965	0.006	9.29e-09	0.3513
rs9469434	C	G	0.965	0.007	4.41e-08	0.2851
rs10758593	A	G	0.965	0.006	4.9e-09	0.3989
rs7402939	T	C	0.965	0.006	5.19e-09	0.376
rs2838787	A	G	0.965	0.006	7.65e-09	0.3924
rs6702604	A	G	0.964	0.006	1.3e-09	0.5843
rs823247	T	C	0.964	0.006	5.25e-10	0.479
rs1519102	C	G	0.964	0.006	1.9e-08	0.6891
rs1064213	A	G	0.964	0.006	6.41e-10	0.4789
rs7599697	T	C	0.964	0.006	5e-09	0.3583
rs2388840	A	G	0.964	0.006	1.37e-09	0.5757
rs7475916	C	G	0.964	0.006	6.7e-09	0.3533
rs4767645	T	G	0.964	0.006	6.47e-10	0.4614
rs6510033	A	G	0.964	0.007	4.66e-08	0.7253
rs623025	T	C	0.963	0.007	3.16e-08	0.2552
rs73163783	T	C	0.963	0.007	1.39e-08	0.7232
rs10944696	A	G	0.963	0.007	7.99e-09	0.2978
rs6973090	A	G	0.963	0.007	4.31e-08	0.25
rs671985	A	G	0.963	0.006	2.79e-10	0.4516
rs11001276	A	T	0.963	0.007	2.52e-08	0.74
rs214934	A	T	0.963	0.006	3.16e-09	0.3123
rs6589988	A	G	0.963	0.006	4.7e-09	0.6757
rs8181889	A	G	0.963	0.006	8.9e-10	0.3992
rs1536053	T	C	0.963	0.006	6.04e-09	0.3157
rs3184470	A	G	0.963	0.006	9.73e-10	0.3507
rs8076183	T	C	0.963	0.006	2.75e-10	0.4485
rs1937447	C	G	0.962	0.007	2.08e-08	0.7593
rs7571486	A	G	0.962	0.007	1.4e-08	0.251
rs4502882	T	C	0.962	0.006	7.96e-10	0.6578
rs6457796	T	C	0.962	0.007	1.12e-08	0.7313
rs4090240	T	C	0.962	0.007	8.46e-09	0.2775
rs12251016	A	T	0.962	0.006	3.89e-10	0.6559
rs224029	T	C	0.962	0.006	2.51e-10	0.3995
rs566673	T	G	0.962	0.006	1.18e-10	0.5351
rs10502966	A	G	0.962	0.006	8.54e-11	0.582
rs7615602	C	G	0.961	0.007	2.59e-09	0.2715
rs521484	A	G	0.961	0.007	1.53e-08	0.7668
rs75932578	T	C	0.961	0.007	4.15e-08	0.2159
rs12790660	T	C	0.961	0.006	4.49e-10	0.6844
rs2389631	A	C	0.961	0.006	2.03e-10	0.6666
rs2089358	T	C	0.96	0.007	2.75e-10	0.7038
rs1289939	T	C	0.96	0.007	6e-09	0.2325
rs11803128	A	G	0.96	0.006	6.85e-11	0.6541
rs6545798	A	T	0.96	0.006	1.19e-11	0.4104
rs4664299	T	C	0.96	0.007	4.95e-09	0.2349
rs3774751	T	G	0.96	0.006	7.32e-12	0.4621
rs7044885	C	G	0.96	0.006	5.67e-12	0.4417
rs6734957	T	G	0.959	0.007	1.82e-09	0.2388
rs62301574	C	G	0.959	0.007	1.37e-08	0.7996
rs12917449	A	C	0.959	0.008	2.97e-08	0.8061
rs9889282	A	C	0.959	0.006	4.7e-12	0.6129
rs11126082	C	G	0.958	0.006	8.26e-13	0.4398
rs984306	T	C	0.958	0.007	7.94e-10	0.7547
rs314281	T	C	0.958	0.006	6.03e-13	0.4531
rs10761240	A	G	0.958	0.006	2.12e-12	0.3963
rs12912299	T	C	0.958	0.006	4.42e-13	0.4893
rs4238755	A	C	0.958	0.007	2.3e-10	0.2638
rs60565673	T	G	0.958	0.006	1.59e-12	0.6211
rs12983032	A	G	0.958	0.006	1.07e-11	0.3434
rs694786	T	C	0.957	0.006	1.97e-13	0.4605
rs17083297	A	C	0.957	0.008	1.6e-08	0.1766
rs3131638	A	G	0.957	0.007	7.88e-10	0.2261
rs6967168	T	G	0.957	0.007	1.39e-10	0.7544
rs524859	A	G	0.957	0.006	1.48e-12	0.3601
rs61921611	T	C	0.957	0.006	7.84e-12	0.692
rs7214267	A	G	0.957	0.006	5.09e-13	0.581
rs61765555	T	C	0.956	0.007	4e-11	0.2552
rs11605348	A	G	0.956	0.006	7.01e-13	0.3495
rs16990210	T	C	0.955	0.008	1.97e-08	0.8478
rs12540241	A	T	0.955	0.008	1.58e-09	0.1926
rs10947690	A	G	0.954	0.007	4.04e-12	0.7408
rs4702	A	G	0.953	0.006	6.78e-16	0.5562
rs73079014	T	C	0.952	0.009	3.65e-08	0.126
rs8180817	C	G	0.952	0.006	1.83e-16	0.4304
rs76145129	T	G	0.951	0.009	2.73e-08	0.1238
rs1031654	A	C	0.95	0.007	3.88e-12	0.7996
rs152555	A	G	0.949	0.008	4.83e-10	0.8544
rs2431108	T	C	0.948	0.006	7.83e-17	0.672
rs9394502	T	C	0.947	0.006	7.76e-18	0.3343
rs4709655	T	C	0.947	0.009	3.09e-09	0.1191
rs28582096	A	G	0.947	0.007	1.74e-13	0.205
rs4981170	A	G	0.947	0.008	7.33e-13	0.1943
rs72657797	T	C	0.946	0.008	1.52e-12	0.1759
rs8180457	T	C	0.946	0.008	1.12e-11	0.1573
rs73671843	A	G	0.946	0.009	5.49e-10	0.1257
rs17324524	T	C	0.944	0.009	5.01e-10	0.883
rs13010288	T	G	0.942	0.009	9.26e-12	0.1326
rs62383308	A	G	0.942	0.011	3.98e-08	0.0805
rs17643634	T	C	0.942	0.008	1.34e-13	0.165
rs66674044	A	T	0.942	0.009	2.18e-12	0.8573
rs6119267	C	G	0.942	0.006	2.32e-20	0.6891
rs492858	T	C	0.936	0.011	3.46e-09	0.0759
rs10947428	T	C	0.934	0.007	9.06e-21	0.7858
rs79693059	C	G	0.93	0.011	1.61e-11	0.9158
rs9527083	A	G	0.927	0.006	1.61e-32	0.6705
rs11838830	A	G	0.923	0.013	5.2e-10	0.9436
rs4699157	T	C	0.922	0.015	3.98e-08	0.958
rs7432782	T	C	0.92	0.014	7.42e-09	0.9558
rs13135092	A	G	0.915	0.011	2.53e-16	0.9175
rs17520265	A	G	0.913	0.016	2.87e-08	0.0342
rs78206187	A	G	0.91	0.013	2.96e-13	0.9442
rs117630493	C	G	0.904	0.018	3.61e-08	0.9726
rs138678612	A	G	0.89	0.02	1.41e-08	0.9783
rs117152417	A	G	0.863	0.026	2.82e-08	0.0128
rs143925775	A	C	0.774	0.045	1.03e-08	0.0044

## Sheet: Table S3
Table S3: Genetic instruments for total sleep duration
SNP	effect_allele	other_allele	eaf	beta	se
rs7556815	A	G	0.219	2.443	0.164
rs75539574	C	A	0.086	2.175	0.244
rs12607679	T	C	0.738	1.208	0.156
rs915416	C	G	0.29	1.156	0.15
rs9940646	C	G	0.578	1.017	0.137
rs13109404	T	G	0.928	1.872	0.264
rs8050478	G	A	0.5	0.96	0.136
rs56372231	T	C	0.334	1.017	0.144
rs13088093	G	T	0.336	0.976	0.144
rs2079070	C	G	0.265	1.053	0.154
rs34556183	A	G	0.72	1.015	0.151
rs3095508	C	A	0.594	0.921	0.138
rs34731055	T	C	0.181	1.168	0.177
rs73219758	G	A	0.708	0.984	0.15
rs10973207	T	G	0.158	1.226	0.187
rs2139261	G	C	0.749	1.122	0.174
rs4592416	G	A	0.464	0.881	0.136
rs365663	A	G	0.546	0.878	0.137
rs1517572	C	A	0.581	0.879	0.138
rs7915425	T	C	0.175	1.144	0.179
rs330088	C	T	0.547	0.868	0.137
rs8038326	A	G	0.727	0.955	0.152
rs460692	C	T	0.137	1.263	0.2
rs9382445	T	C	0.623	0.872	0.14
rs4767550	G	A	0.414	0.858	0.139
rs11885663	T	C	0.248	0.973	0.157
rs1991556	G	A	0.774	0.994	0.163
rs1057703	G	T	0.147	1.164	0.192
rs4128364	C	T	0.339	0.876	0.143
rs61796569	T	C	0.27	0.927	0.154
rs10483350	G	A	0.195	1.042	0.172
rs7115226	A	C	0.074	1.594	0.261
rs269054	A	T	0.422	0.819	0.138
rs112230981	A	G	0.95	1.892	0.314
rs11602180	C	T	0.837	1.095	0.184
rs2192528	A	G	0.48	0.802	0.136
rs12246842	A	G	0.46	0.804	0.136
rs205024	T	C	0.384	0.83	0.14
rs12567114	A	G	0.276	0.89	0.152
rs7616632	T	G	0.522	0.792	0.136
rs6575005	T	C	0.758	0.934	0.159
rs1776776	T	C	0.874	1.198	0.205
rs11621908	C	T	0.917	1.446	0.25
rs10421649	A	T	0.557	0.798	0.138
rs2072727	T	C	0.436	0.795	0.137
rs113113059	T	C	0.78	0.968	0.164
rs374153	C	T	0.158	1.057	0.186
rs151014368	A	G	0.206	0.966	0.169
rs62120041	T	C	0.934	1.567	0.274
rs7503199	C	T	0.734	0.885	0.154
rs1939455	G	T	0.879	1.226	0.214
rs7951019	G	T	0.032	2.213	0.391
rs17732997	C	G	0.569	0.776	0.137
rs61985058	T	C	0.143	1.116	0.194
rs17427571	A	G	0.684	0.83	0.146
rs7806045	T	C	0.755	0.887	0.158
rs35531607	C	T	0.474	0.77	0.136
rs7644809	T	C	0.422	0.784	0.138
rs9345234	C	A	0.578	0.781	0.138
rs12791153	T	A	0.081	1.413	0.253
rs1263056	A	G	0.519	0.768	0.137
rs55658675	C	T	0.645	0.788	0.142
rs11567976	T	C	0.571	0.768	0.137
rs180769	T	C	0.425	0.763	0.138
rs1553132	G	A	0.258	0.87	0.155
rs9903973	C	T	0.467	0.766	0.136
rs11614986	A	G	0.821	0.983	0.177
rs2231265	G	A	0.772	0.897	0.162
rs174560	C	T	0.314	0.815	0.146
rs10173260	C	T	0.606	0.77	0.139
rs72804080	G	A	0.15	1.068	0.192
rs12611523	A	G	0.545	0.758	0.137
rs11643715	G	C	0.291	0.834	0.15
rs4538155	T	C	0.647	0.779	0.142
rs34354917	C	A	0.71	0.825	0.15
rs80193650	G	A	0.162	1.01	0.184
rs10761674	C	T	0.477	0.74	0.136
rs11190970	G	A	0.799	0.923	0.169

## Sheet: Table S4
Table S4: Genetic instruments for short sleep duration
SNP	effect_allele	other_allele	eaf	beta	se
rs2863957	C	A	0.782	-2.434	0.164
rs13107325	T	C	0.075	-1.822	0.259
rs1229762	T	C	0.665	-0.955	0.144
rs1380703	G	A	0.384	-0.972	0.142
rs12963463	C	T	0.299	-1.132	0.15
rs75539574	A	C	0.915	-2.175	0.244
rs17388803	C	A	0.106	-1.241	0.225
rs4585442	G	A	0.311	-0.744	0.147
rs1607227	G	T	0.705	-0.826	0.149
rs2820313	G	A	0.341	-0.659	0.143
rs17005118	A	G	0.265	-0.855	0.154
rs5757675	G	T	0.26	-0.636	0.156
rs12567114	G	A	0.725	-0.89	0.152
rs142180737	C	T	0.009	-3.74	0.754
rs2186122	T	A	0.562	-0.812	0.138
rs11763750	G	A	0.814	-1.083	0.175
rs12518468	C	T	0.328	-0.773	0.145
rs9367621	T	A	0.431	-0.797	0.137
rs3776864	A	C	0.667	-0.996	0.144
rs60882754	A	T	0.939	-1.314	0.283
rs59779556	T	G	0.554	-0.936	0.137
rs2014830	C	T	0.698	-0.531	0.149
rs205024	C	T	0.617	-0.83	0.14
rs12661667	T	C	0.263	-0.708	0.154
rs7939345	T	G	0.208	-0.985	0.167
rs9321171	C	T	0.54	-0.299	0.137
rs7524118	C	T	0.708	-1.148	0.149

## Sheet: Table S5
Table S5: Genetic instruments for long sleep duration
SNP	effect_allele	other_allele	eaf	beta	se
rs6737318	G	A	0.222	2.442	0.164
rs75458655	T	C	0.023	2.064	0.455
rs17688916	T	A	0.796	0.903	0.172
rs17817288	A	G	0.518	0.829	0.136
rs549961083	T	C	0.001	49.74	8.16
rs3751046	G	A	0.147	1.165	0.192
rs7534398	A	T	0.201	0.738	0.17
rs10899257	A	G	0.144	0.419	0.193

## Sheet: Table S6
Table S6: Genetic instruments for chronotype
SNP	A1	A2	AF1	Beta	Zscore (Uncorrected)	SE
rs909757	T	C	0.63	0.0197	6.001	0.00328279
rs61773390	T	G	0.1931	0.0659	14.061	0.00468672
rs12065331	T	C	0.3125	-0.0244	-7.048	0.00346197
rs17448682	T	C	0.2339	0.0348	8.574	0.00405878
rs10917513	T	C	0.6476	-0.0309	-8.264	0.00373911
rs10916892	T	C	0.6203	-0.0345	-9.337	0.00369498
rs2506089	T	G	0.5682	0.0198	5.818	0.00340323
rs12140153	T	G	0.0892	-0.0604	-9.303	0.00649253
rs11208844	A	G	0.1408	-0.029	-6.116	0.00474166
rs12040629	A	G	0.16	0.0727	14.762	0.00492481
rs11588913	A	G	0.4037	-0.0236	-6.6	0.00357576
rs5016898	T	C	0.4238	-0.0241	-6.524	0.00369405
rs72720396	A	G	0.7741	-0.0416	-9.898	0.00420287
rs481214	A	T	0.6063	0.0232	5.877	0.00394759
rs11165655	A	G	0.5281	-0.0281	-7.579	0.00370761
rs17575798	A	G	0.1918	-0.0336	-7.937	0.00423334
rs6690292	T	C	0.7285	-0.0247	-5.93	0.00416526
rs11102807	A	G	0.5361	-0.0219	-6.044	0.00362343
rs9436119	A	G	0.3842	0.0395	11.92	0.00331376
rs6665637	A	G	0.2804	-0.0196	-6.309	0.00310667
rs115073088	A	G	0.975	-0.0755	-7.26	0.0103994
rs975025	T	C	0.0758	-0.049	-7.848	0.00624363
rs1144566	T	C	0.029	0.2306	21.723	0.0106155
rs146820337	D	I	0.4751	-0.0397602	-6.686	0.00594678
rs1221502	A	C	0.7386	0.0197	5.951	0.00331037
rs4657983	A	G	0.6511	-0.0252	-6.815	0.00369773
rs6429233	A	G	0.4574	0.0202	5.973	0.00338188
rs13011556	C	G	0.7624	-0.0285	-7.781	0.00366277
rs62124718	A	G	0.895	-0.0447	-7.666	0.00583094
rs72796401	A	T	0.1903	0.0246	7.531	0.0032665
rs6718511	A	G	0.557	0.0209	6.001	0.00348275
rs11678584	A	T	0.8599	-0.0278	-6.161	0.00451225
rs848552	C	G	0.4755	-0.0282	-7.897	0.00357098
rs7602499	T	C	0.3536	0.0223	5.776	0.0038608
rs75120545	T	C	0.0319	0.0862	8.751	0.0098503
rs6544906	A	C	0.5616	0.0233	6.494	0.00358793
rs17396357	T	C	0.3818	0.0211	5.858	0.00360191
rs12470914	A	T	0.1005	0.053	8.86	0.00598194
rs4672458	T	C	0.4764	-0.0224	-6.697	0.00334478
rs13414393	T	C	0.5405	-0.0219	-6.092	0.00359488
rs10175975	T	C	0.1853	0.0252	6.386	0.00394613
rs359248	T	G	0.4564	-0.0275	-8.604	0.00319619
rs812925	C	G	0.6458	-0.0306	-8.754	0.00349555
rs113851554	T	G	0.0567	-0.054	-7.728	0.00698758
rs2706762	T	C	0.1496	-0.037	-7.938	0.00466112
rs12464387	A	G	0.4638	-0.0214	-6.393	0.00334741
rs6727752	A	G	0.3569	0.0256	6.647	0.00385136
rs10520176	T	C	0.4926	0.0377	10.606	0.00355459
rs11681299	T	C	0.2835	0.0237	6.098	0.00388652
rs34509802	A	G	0.1785	0.0396	7.432	0.00532831
rs76064513	T	C	0.1342	0.0338	5.803	0.00582457
rs77248969	A	G	0.1116	-0.0333	-6.132	0.00543053
rs28380327	A	T	0.6317	0.04	10.825	0.00369515
rs2166559	T	C	0.8611	-0.0329	-6.329	0.00519829
rs747003	T	C	0.6088	0.0196	5.822	0.00336654
rs13004345	T	C	0.6475	-0.0189	-6.27	0.00301435
rs6433478	T	C	0.4601	-0.0253	-7.11	0.00355837
rs4666682	A	G	0.1797	-0.0254	-6.182	0.0041087
rs11677484	T	G	0.2574	0.0229	6.376	0.00359159
rs1064213	A	G	0.4826	0.0444	12.165	0.00364981
rs184033703	A	G	0.0585	0.0577	7.761	0.00743461
rs80271258	T	C	0.0844	-0.0894	-14.427	0.00619671
rs62182135	A	C	0.3285	-0.0242	-7.455	0.00324614
rs35346733	A	G	0.1942	-0.0316	-6.54	0.0048318
rs111261826	A	C	0.679	-0.028	-6.926	0.00404274
rs149611468	T	C	0.9888	0.1432	8.176	0.0175147
rs6794796	A	G	0.2897	0.0253	6.598	0.00383449
rs9817910	A	G	0.5576	-0.0216	-6.686	0.00323063
rs73050286	T	C	0.7817	0.0297	6.942	0.00427831
rs2362775	T	C	0.5342	-0.0218	-6.096	0.00357611
rs114848860	A	T	0.9737	-0.0768	-7.775	0.00987781
rs78580841	T	C	0.0694	0.0424	6.944	0.00610599
rs12636669	T	C	0.0801	0.057	9.335	0.00610605
rs17007397	C	G	0.5801	0.0231	5.723	0.00403635
rs7626335	A	C	0.3305	-0.0286	-7.214	0.00396451
rs7429614	T	G	0.416	0.0349	9.424	0.00370331
rs112201801	T	C	0.9291	-0.0852	-6.78	0.0125654
rs12631477	T	C	0.7982	0.0277	6.206	0.00446342
rs1449403	A	G	0.1226	0.0424	7.537	0.00562558
rs34967119	A	G	0.4958	0.02	5.994	0.00333667
rs1398346	T	C	0.8668	0.0259	5.739	0.00451298
rs1800828	C	G	0.7508	0.0257	5.881	0.00437
rs72950188	T	C	0.9238	0.0447	6.696	0.00667563
rs72966564	T	C	0.2507	-0.0234	-6.061	0.00386075
rs13065394	T	G	0.286	-0.0274	-6.916	0.00396183
rs4550782	T	G	0.6655	0.0282	7.237	0.00389664
rs7649164	T	G	0.5745	0.0211	6.087	0.0034664
rs6440833	A	G	0.4638	0.021	6.422	0.00327001
rs111867612	A	C	0.1021	-0.032	-5.743	0.005572
rs1599374	A	G	0.5163	0.0309	8.266	0.00373821
rs3850174	A	T	0.2575	-0.0346	-8.276	0.00418076
rs301218	A	G	0.3916	-0.0237	-6.72	0.00352679
rs9836621	T	C	0.5217	-0.0279	-7.714	0.0036168
rs1468945	A	G	0.7852	-0.0363	-8.482	0.00427965
rs3796618	A	T	0.5293	-0.0229	-6.011	0.00380968
rs4690085	A	G	0.5348	-0.0193	-5.88	0.00328231
rs4698678	C	G	0.2786	0.0307	7.1	0.00432394
rs1502249	A	G	0.5223	0.0173	5.826	0.00296945
rs6838677	A	C	0.6689	-0.0213	-5.829	0.00365414
rs4860734	A	G	0.2897	0.0195	5.83	0.00334477
rs6816922	A	C	0.5377	-0.02	-5.743	0.0034825
rs6846730	T	C	0.2353	-0.0323	-7.986	0.00404458
rs2850979	T	C	0.7603	-0.0234	-6.205	0.00377115
rs10610420	D	I	0.7138	0.0394293	5.99	0.00658252
rs7700110	A	G	0.2566	0.0242	6.163	0.00392666
rs17455138	T	C	0.7655	0.0307	6.772	0.00453337
rs9991917	A	T	0.19	0.0452703	5.986	0.0075627
rs4241964	T	G	0.5217	-0.0287	-8.43	0.00340451
rs938836	A	G	0.467	-0.0212	-6.402	0.00331146
rs72729847	T	C	0.8005	-0.0303	-6.731	0.00450156
rs9997394	A	G	0.2866	-0.0254	-6.396	0.00397123
rs10058356	T	C	0.6958	-0.0207	-6.285	0.00329356
rs67169439	D	I	0.6014	-0.0353081	-5.781	0.00610761
rs7701529	A	T	0.2393	-0.0295	-7.235	0.0040774
rs7721608	T	G	0.4648	0.0204	6.285	0.00324582
rs66507804	T	C	0.799	-0.0322	-6.924	0.00465049
rs4269995	T	C	0.251	-0.0339	-9.576	0.0035401
rs77960	A	G	0.3304	0.0221	6.808	0.00324618
rs1559253	A	G	0.3588	0.0217	6.112	0.00355039
rs17140201	A	G	0.172	-0.0285	-6.006	0.00474526
rs13172141	A	T	0.5694	0.0217	6.302	0.00344335
rs67988891	C	G	0.6821	-0.0363	-9.202	0.0039448
rs2901796	A	G	0.3983	0.0246	6.487	0.0037922
rs42210	C	G	0.7124	-0.0291	-6.521	0.00446251
rs12518401	A	G	0.3844	-0.0236	-6.705	0.00351976
rs7735794	A	G	0.2241	0.0344	5.857	0.00587331
rs465670	T	C	0.5404	0.0241	6.616	0.00364268
rs9394154	C	G	0.436	-0.0217	-6.433	0.00337323
rs34125199	D	I	0.3497	0.0370933	5.948	0.00623626
rs9381812	A	G	0.7051	-0.0495	-12.675	0.00390532
rs1811899	T	C	0.7895	-0.0298	-6.357	0.00468775
rs9465253	T	C	0.2801	0.023	6.217	0.00369953
rs766406	T	G	0.6409	-0.0236	-6.463	0.00365155
rs486416	A	G	0.6527	-0.0201	-6.348	0.00316635
rs13203140	T	C	0.6353	-0.0252	-6.323	0.00398545
rs3923809	A	G	0.6947	-0.022	-5.802	0.0037918
rs12206814	C	G	0.4869	0.0254	5.978	0.00424891
rs2396004	A	G	0.4354	0.0214	6.215	0.00344328
rs3857599	A	C	0.1659	0.0322	6.262	0.00514213
rs2653349	A	G	0.2073	0.0659	15.31	0.00430438
rs9476310	T	C	0.5104	0.0263	7.51	0.003502
rs1931814	A	G	0.4787	0.0264	7.646	0.00345279
rs2881955	T	C	0.2788	0.0271	6.88	0.00393895
rs12195792	A	T	0.2717	0.034	8.209	0.0041418
rs11154718	T	C	0.43	-0.0233	-6.346	0.0036716
rs60616179	A	G	0.9443	0.0509	6.593	0.00772031
rs4535583	T	C	0.6991	0.0212	5.77	0.00367418
rs9496623	A	G	0.7328	-0.0235	-5.838	0.00402535
rs2050185	A	G	0.6245	0.0217	6.079	0.00356967
rs9479402	T	C	0.9883	-0.2186	-12.566	0.0173961
rs9347926	A	T	0.4407	0.0264	7.765	0.00339987
rs9348050	T	C	0.4864	0.0221	6.835	0.00323336
rs4027217	A	C	0.217	-0.0258	-5.735	0.00449869
rs10237162	T	C	0.7232	0.0368	9.187	0.00400566
rs10951325	T	C	0.6319	0.0336	9.554	0.00351685
rs6967481	T	C	0.5011	0.0321	9.804	0.00327417
rs4236237	A	C	0.5992	-0.0242	-6.772	0.00357354
rs2944831	A	G	0.2946	0.025	6.804	0.00367431
rs3807651	A	T	0.4938	0.0246	6.03	0.0040796
rs10254050	C	G	0.1905	-0.0577	-11.751	0.00491022
rs4729854	A	T	0.4701	-0.0485	-13.147	0.00368906
rs2396719	A	G	0.239	0.0331	7.47	0.00443106
rs17302081	T	C	0.4414	0.022	6.041	0.00364178
rs6968240	A	C	0.4171	0.0216	6.622	0.00326185
rs62465218	A	C	0.1456	-0.0274	-6.011	0.00455831
rs6958557	T	G	0.6067	0.0261	7.269	0.00359059
rs113161209	A	G	0.077	0.0442	5.777	0.00765103
rs2072413	T	C	0.2624	-0.0208	-5.714	0.00364018
rs62479736	T	G	0.2915	0.0243	6.551	0.00370936
rs35524253	A	G	0.3539	0.0342	9.123	0.00374877
rs2979139	A	G	0.5048	-0.0267	-7.928	0.00336781
rs2322605	A	G	0.4684	-0.0215	-6.253	0.00343835
rs71523448	C	G	0.0788	-0.0499	-7.732	0.0064537
rs6993892	T	C	0.6162	-0.0347	-9.599	0.00361496
rs6468316	T	C	0.4708	-0.0197	-5.811	0.00339012
rs7845620	A	C	0.8344	-0.0425	-9.285	0.00457727
rs10109566	A	G	0.4849	-0.0222	-6.032	0.00368037
rs34054660	A	G	0.5747	0.0249	5.734	0.00434252
rs187028	A	T	0.3146	-0.0222	-6.655	0.00333584
rs16939162	A	G	0.8304	0.038	8.084	0.00470064
rs6988733	T	C	0.3491	0.0229	5.821	0.00393403
rs7006885	A	G	0.2878	0.0301	7.152	0.00420861
rs3100052	A	G	0.3886	0.0246	6.978	0.00352536
rs2737245	T	G	0.2748	0.0335	8.866	0.00377848
rs1871729	A	G	0.6816	-0.0232	-6.051	0.00383408
rs6477309	T	C	0.6661	0.0309	8.213	0.00376233
rs2844016	T	C	0.2935	0.0266	6.254	0.00425328
rs308521	T	C	0.6039	0.0283	8.828	0.00320571
rs4878734	A	T	0.5114	0.0218	5.725	0.00380786
rs6560218	T	C	0.5183	-0.0224	-5.948	0.00376597
rs62553781	T	C	0.0329	-0.0689	-7.462	0.00923345
rs12378543	T	C	0.3841	-0.0233	-6.137	0.00379664
rs555784	A	T	0.3803	-0.0249	-6.592	0.00377731
rs295268	T	C	0.7403	-0.0308	-6.702	0.00459564
rs3138490	A	T	0.515	0.0235	6.463	0.00363608
rs10759208	T	C	0.6138	-0.0248	-6.538	0.00379321
rs11788633	C	G	0.6547	0.0197	6.067	0.00324707
rs10818834	T	C	0.7297	0.0302	7.246	0.00416782
rs10988239	T	C	0.5117	-0.0213	-6.954	0.00306298
rs12380242	T	C	0.5058	-0.0206	-6.45	0.0031938
rs28458909	T	C	0.1225	-0.0702	-12.691	0.00553148
rs497338	T	C	0.2881	0.0271	6.675	0.00405992
rs66617308	T	C	0.6713	0.0184	5.737	0.00320725
rs9416744	A	C	0.2595	0.0344	8.742	0.00393503
rs11597421	A	G	0.4973	-0.0238	-5.903	0.00403185
rs12249410	T	G	0.1077	-0.0337	-6.246	0.00539545
rs17712705	A	G	0.3265	-0.0247	-6.192	0.00398902
rs2298117	T	C	0.448	-0.0225	-6.159	0.00365319
rs10762434	C	G	0.7752	0.0249	5.865	0.00424552
rs2648721	T	G	0.7039	-0.0238	-5.861	0.00406074
rs61875203	T	C	0.2773	0.0259	6.289	0.0041183
rs1163238	A	G	0.3885	-0.0237	-5.782	0.00409893
rs7900191	T	C	0.4035	-0.0187	-5.72	0.00326923
rs11200159	A	C	0.6551	-0.0234	-6.161	0.00379809
rs3808964	T	G	0.6326	0.02	5.953	0.00335965
rs9664044	T	C	0.2319	-0.0268	-6.286	0.00426344
rs10830107	A	G	0.7922	0.0283	6.144	0.00460612
rs76518095	T	C	0.0772	0.0398	6.05	0.00657851
rs12771973	A	G	0.2475	-0.0223	-5.868	0.00380027
rs60521023	D	I	0.2965	0.0429092	6.53	0.00657109
rs10832648	A	C	0.1989	-0.0314	-7.179	0.00437387
rs10742179	A	G	0.2627	0.0352	8.255	0.00426408
rs4923541	T	C	0.5104	0.0247	6.488	0.00380703
rs621421	T	C	0.6256	-0.0273	-8.008	0.00340909
rs11032362	A	G	0.0937	0.0704	11.424	0.00616246
rs7111582	A	G	0.8956	-0.0388	-7.921	0.00489837
rs10838687	T	G	0.7918	0.0345	7.71	0.00447471
rs12808544	A	C	0.2409	-0.0348	-8.267	0.00420951
rs662094	A	G	0.4944	0.0282	7.561	0.00372967
rs1278402	A	G	0.736	0.0281	6.255	0.00449241
rs1508608	A	G	0.3199	0.028	7.499	0.00373383
rs4121878	C	G	0.5008	0.0219	6.037	0.00362763
rs17577073	A	C	0.5636	0.0246	6.665	0.00369092
rs2514214	A	G	0.2691	0.027	6.288	0.00429389
rs4936290	A	C	0.6584	-0.0229	-6.735	0.00340015
rs3867239	A	G	0.3762	0.0262	7.033	0.00372529
rs74357745	A	G	0.8803	0.0312	6.56	0.0047561
rs7943634	T	C	0.3075	-0.0235	-6.429	0.00365531
rs3782860	T	C	0.543	0.025	6.857	0.00364591
rs1799464	A	G	0.2868	-0.02	-5.816	0.00343879
rs12298405	T	C	0.3301	-0.0234	-6.695	0.00349515
rs2433634	A	C	0.7241	-0.0268	-6.533	0.00410225
rs11611435	T	C	0.5561	0.0278	6.843	0.00406255
rs13377754	T	C	0.6104	0.0485	13.919	0.00348445
rs1843888	A	G	0.5433	0.0513	14.469	0.00354551
rs247929	C	G	0.5081	0.031	8.792	0.00352593
rs7975791	T	C	0.0384	0.0513	6.127	0.00837278
rs4761989	T	C	0.868	-0.0333	-6.452	0.00516119
rs7299922	A	G	0.6388	0.0239	6.876	0.00347586
rs487722	T	G	0.2084	0.0273	6.304	0.00433058
rs10877962	T	C	0.4083	0.0359	9.105	0.00394289
rs711098	A	C	0.3979	0.0217	6.095	0.0035603
rs7959983	T	C	0.5955	-0.0299	-8.514	0.00351186
rs7304278	A	G	0.2827	-0.0291	-8.055	0.00361266
rs7298532	T	C	0.7213	0.027	6.723	0.00401606
rs3955311	T	C	0.1491	0.026	5.825	0.00446352
rs80097534	T	G	0.0966	-0.0357	-6.23	0.00573034
rs9597241	A	C	0.8106	0.0332	7.808	0.00425205
rs12871550	A	G	0.3229	0.0268	7.419	0.00361235
rs9571526	T	G	0.7706	-0.0272	-6.124	0.00444154
rs2593487	A	G	0.3361	-0.0285	-7.371	0.0038665
rs495593	A	G	0.7383	0.0226	6.182	0.00365577
rs45597035	A	G	0.6469	-0.0222	-5.882	0.00377423
rs9573980	A	G	0.9659	0.1265	13.134	0.00963149
rs1886205	A	C	0.7604	0.0293	7.864	0.00372584
rs9558942	T	C	0.6722	-0.0192	-5.736	0.00334728
rs3815983	T	C	0.3604	-0.0216	-6.548	0.00329872
rs1163628	A	C	0.8572	-0.0287	-6.187	0.00463876
rs61990287	A	C	0.2742	0.0248	6.096	0.00406824
rs2878172	A	G	0.5693	-0.0213	-6.071	0.00350848
rs962961	T	C	0.3308	-0.0219	-6.911	0.00316886
rs6573308	T	C	0.3941	0.0248	5.996	0.00413609
rs7143933	T	G	0.2615	0.0246	6.082	0.00404472
rs2978382	T	C	0.5852	0.0232	6.083	0.00381391
rs4903203	A	G	0.3237	0.0247	6.697	0.00368822
rs12436039	T	C	0.8801	0.0332	5.806	0.00571822
rs4550384	T	G	0.758	0.0237	6.319	0.00375059
rs710284	T	C	0.5797	0.022	5.898	0.00373008
rs11845599	A	G	0.6353	-0.0274	-7.567	0.00362099
rs59986227	C	G	0.7493	-0.0307	-7.084	0.00433371
rs12442008	T	C	0.2593	0.0285	6.884	0.00414004
rs4775086	A	G	0.2363	-0.0267	-5.97	0.00447236
rs12442674	A	C	0.7296	0.0229	6.046	0.00378763
rs1873958	A	G	0.4088	0.0279	8.3	0.00336145
rs72773411	A	G	0.1529	0.0293	5.823	0.00503177
rs12445235	C	G	0.4098	-0.0211	-5.95	0.00354622
rs2304467	C	G	0.6066	-0.0237	-6.075	0.00390123
rs11641239	T	C	0.2854	0.0229	6.141	0.00372903
rs7203707	A	C	0.5193	-0.0197	-6.518	0.0030224
rs4785296	C	G	0.231	0.0264	6.351	0.00415683
rs3743794	A	G	0.6073	-0.0215	-6.083	0.00353444
rs12927162	A	G	0.7276	0.0561	13.504	0.00415433
rs1421085	T	C	0.5935	-0.0419	-12.354	0.00339161
rs2550298	T	C	0.3811	-0.04	-11.047	0.00362089
rs8044054	T	C	0.3878	0.0307	8.748	0.00350937
rs72790386	T	G	0.0338	0.0604	5.876	0.0102791
rs17604349	A	G	0.1848	-0.0374	-9.417	0.00397154
rs1061032	T	G	0.094	0.0644	10.47	0.00615091
rs11545787	A	G	0.2482	-0.0498	-11.948	0.00416806
rs12950382	A	G	0.7198	0.0234	5.725	0.00408734
rs4365329	A	T	0.5383	-0.0194	-5.829	0.00332819
rs2011528	T	C	0.8254	-0.0329	-6.958	0.00472837
rs3760381	A	G	0.2544	0.0274	6.562	0.00417556
rs7225002	A	G	0.5916	-0.0179	-5.73	0.00312391
rs12600452	A	G	0.2015	0.0255	6.273	0.00406504
rs12051	A	G	0.6119	-0.0264	-7.577	0.00348423
rs55846845	A	G	0.5177	-0.021	-6.896	0.00304524
rs72829706	A	G	0.96	0.0563	6.744	0.00834816
rs8072058	A	T	0.7812	-0.0281	-6.033	0.00465772
rs412000	C	G	0.555	-0.0224	-6.317	0.00354599
rs58681483	A	G	0.918	0.0352	6.012	0.00585496
rs72841368	A	T	0.8104	-0.0301	-6.998	0.00430123
rs2916148	A	G	0.4522	0.0279	7.961	0.00350459
rs2580160	A	G	0.5554	0.0283	6.926	0.00408605
rs62082402	T	G	0.1936	0.05	9.303	0.00537461
rs1788784	A	G	0.3442	-0.0273	-6.567	0.00415715
rs1013987	T	C	0.4033	-0.0291	-7.557	0.00385073
rs4419127	A	G	0.6622	0.0444	11.889	0.00373455
rs9950528	A	G	0.6505	-0.0235	-6.154	0.00381865
rs12969848	T	C	0.5313	0.0355	10.031	0.00353903
rs9956387	A	T	0.4953	-0.0198	-5.829	0.00339681
rs4800998	A	T	0.1827	0.0394	7.905	0.00498419
rs9964420	A	C	0.2983	-0.0488	-13.389	0.00364478
rs11152350	A	C	0.467	-0.0281	-7.774	0.00361461
rs34329963	T	C	0.113	-0.0318	-5.969	0.00532753
rs1025601	T	C	0.3855	-0.0218	-5.829	0.00373992
rs10402849	T	C	0.2002	0.0259	6.218	0.00416533
rs36055559	A	G	0.166	-0.036	-7.186	0.00500974
rs7248205	T	C	0.6003	0.0267	7.474	0.00357238
rs9636202	A	G	0.2662	-0.026	-6.935	0.0037491
rs73026775	A	G	0.1246	-0.0335	-5.868	0.00570893
rs4804951	A	G	0.3306	0.0234	6.148	0.00380612
rs56113850	T	C	0.4231	-0.0229	-6.64	0.0034488
rs58876439	A	G	0.0674	0.0474	6.964	0.00680643
rs11670534	T	C	0.1614	-0.0305	-6.504	0.00468942
rs6131805	T	G	0.4022	0.0257	7.055	0.00364281
rs6131942	A	G	0.418	-0.0263	-8.451	0.00311206
rs1474754	A	G	0.2636	-0.0214	-5.906	0.00362343
rs6047481	A	T	0.6709	0.0253	6.195	0.00408394
rs1737893	T	C	0.3805	-0.0253	-6.786	0.00372826
rs2072727	T	C	0.4327	0.0282	8.229	0.00342691
rs57236847	C	G	0.6029	0.0269	6.151	0.00437327
rs695459	T	C	0.3906	-0.022	-5.979	0.00367955
rs28459838	T	C	0.2369	0.0266	6.359	0.00418305
rs118047999	C	G	0.2459	0.0236	5.926	0.00398245
rs139911	T	C	0.5722	-0.0336	-9.221	0.00364386
rs9611597	A	T	0.8371	0.0374	7.336	0.00509815
rs6007594	A	G	0.2644	-0.025	-6.479	0.00385862
rs3747463	T	C	0.3609	-0.0316	-6.212	0.00508162
rs213462	A	C	0.55	-0.0363018	-7.253	0.00500507
rs7060620	A	T	0.8143	-0.0448533	-7.111	0.00630759

## Sheet: Table S7
Table S7: Multivariable-adjusted results for insomnia symptoms
	Fixed effect model			Random effect model
	beta	se	pval	beta	se	pval	Total N
Acetate	-0.039342	0.0248287	0.113072	-0.0354752	0.0246949	0.150848	7494
Acetoacetate	-0.0102235	0.0236976	0.666166	-0.00514969	0.0364239	0.887568	8001
Alanine	0.0470188	0.0219868	0.0324764	0.0444879	0.0221676	0.0447619	11327
Albumin	0.0291537	0.0237758	0.220127	0.0267109	0.0237023	0.259771	8005
Apolipoprotein A-I	-0.00471471	0.0185176	0.799027	-0.00477642	0.01888	0.800278	11327
Apolipoprotein B	0.0341642	0.0211012	0.105434	0.0351635	0.0212983	0.0987383	11327
Citrate	-0.0755647	0.0207032	0.000262337	-0.0694908	0.0364223	0.0564017	11326
Conjugated linoleic acid	-0.000398869	0.028669	0.988899	0.00366085	0.0439648	0.933639	5025
Creatinine	0.0273289	0.0202372	0.176878	0.0252582	0.0260122	0.331542	8003
Diacylglycerol	0.0285205	0.0256965	0.267043	0.028437	0.0303072	0.348094	8343
22:6, docosahexaenoic acid	-0.00680481	0.0209961	0.745864	-0.00562358	0.0208812	0.787688	11098
Esterified cholesterol	0.00994524	0.0206322	0.629788	0.00965695	0.0205704	0.638742	11310
Estimated description of fatty acid chain length, not actual carbon number	0.0367558	0.0276196	0.183259	0.0371031	0.0276765	0.180051	7321
Omega-3 fatty acids	-0.0260132	0.0213575	0.223229	-0.0262852	0.0265951	0.322981	11099
Omega-6 fatty acids	0.0197203	0.0215598	0.360361	0.019931	0.0214961	0.353828	11099
Free cholesterol	-0.00652137	0.0206392	0.752025	-0.00546346	0.0205759	0.790604	11312
Glucose	0.0109567	0.021491	0.610172	-0.00291014	0.0396535	0.941496	11325
Glutamine	0.019753	0.0230974	0.392439	0.0177537	0.0232623	0.445346	7969
Glycoprotein acetyls, mainly a1-acid glycoprotein	0.0785598	0.0228476	0.000585115	0.0757227	0.0237492	0.00143044	8005
Total cholesterol in HDL2	-0.0262245	0.0190355	0.168308	-0.0275495	0.0202602	0.173899	11327
Total cholesterol in HDL3	-0.0236423	0.0217453	0.276931	-0.0242192	0.0217974	0.266525	11327
Total cholesterol in HDL	-0.0268879	0.0191235	0.15972	-0.0274226	0.0199916	0.170155	11327
Mean diameter for HDL particles	-0.0406323	0.019078	0.0331881	-0.0431193	0.0202943	0.0336121	11327
Triglycerides in HDL	0.0539462	0.0224004	0.0160283	0.0551676	0.0224422	0.0139632	11327
Histidine	-0.00335605	0.0209766	0.872889	-0.00278212	0.0208617	0.893908	11296
Total cholesterol in IDL	-0.00622111	0.0212606	0.769819	-0.0062197	0.0212062	0.769295	11326
Cholesterol esters in IDL	-0.00240168	0.0213289	0.910346	-0.00220911	0.0212596	0.91724	11326
Free cholesterol in IDL	-0.0130953	0.0212002	0.536775	-0.013631	0.0212209	0.520654	11326
Total lipids in IDL	-0.00291623	0.0211414	0.890289	-0.00287856	0.021082	0.891394	11327
Concentration of IDL particles	-1.77923e-05	0.0213401	0.999335	0.000481669	0.0212702	0.981933	11327
Phospholipids in IDL	-0.00623307	0.0215252	0.772144	-0.0061685	0.021475	0.773927	11326
Triglycerides in IDL	0.0273181	0.0219766	0.213848	0.0277311	0.0220414	0.208343	11326
Isoleucine	0.0411021	0.0196302	0.0362759	0.0389521	0.0206794	0.0596165	11321
18:2, linoleic acid	0.0130655	0.0218105	0.549141	0.0117728	0.0244823	0.630609	11100
Lactate	-0.0350196	0.0221666	0.114144	-0.031477	0.0342638	0.35827	11328
Total cholesterol in LDL	0.000288844	0.021381	0.989221	-0.000141852	0.0213368	0.994696	11327
Mean diameter for LDL particles	-0.0506145	0.0211878	0.016901	-0.0486964	0.0211313	0.0211964	11327
Triglycerides in LDL	0.0213775	0.0217017	0.324594	0.0226021	0.0216545	0.296595	11327
Leucine	0.00683634	0.0197241	0.728893	0.00379913	0.0203089	0.851608	11327
Total cholesterol in large HDL	-0.0362132	0.0193555	0.0613512	-0.0386297	0.020458	0.0589939	11316
Cholesterol esters in large HDL	-0.0343414	0.0193613	0.0761115	-0.0371343	0.0204449	0.0693225	11316
Free cholesterol in large HDL	-0.0388466	0.0194504	0.0458023	-0.0401267	0.0205926	0.0513438	11316
Total lipids in large HDL	-0.0327787	0.0192599	0.0887717	-0.0343354	0.0202652	0.0902072	11316
Concentration of large HDL particles	-0.0302926	0.0193289	0.117065	-0.0330023	0.0226509	0.145117	11316
Phospholipids in large HDL	-0.0294359	0.0193632	0.12846	-0.0309319	0.0217267	0.154538	11316
Triglycerides in large HDL	0.00492697	0.0204986	0.810054	0.00424808	0.0208659	0.838674	11316
Total cholesterol in large LDL	-0.000538574	0.0214063	0.979928	-0.00069659	0.0213534	0.973976	11326
Cholesterol esters in large LDL	0.00224924	0.0214659	0.916549	0.00221591	0.0214112	0.917571	11326
Free cholesterol in large LDL	-0.00754515	0.0213188	0.723399	-0.00783071	0.0213027	0.713178	11326
Total lipids in large LDL	0.00178747	0.0212769	0.933049	0.00178315	0.0212208	0.933034	11326
Concentration of large LDL particles	0.003719	0.0214314	0.862235	0.00393666	0.0213679	0.853832	11326
Phospholipids in large LDL	0.0034574	0.0214197	0.871769	0.00382808	0.0213599	0.857767	11326
Triglycerides in large LDL	0.014406	0.0216727	0.506238	0.0154004	0.021598	0.475817	11326
Total cholesterol in large VLDL	0.0649595	0.0214749	0.0024871	0.0649862	0.0221414	0.00333489	11316
Cholesterol esters in large VLDL	0.0662107	0.0215183	0.00209129	0.0663705	0.0221388	0.00271827	11316
Free cholesterol in large VLDL	0.0627231	0.0215253	0.00356923	0.0625506	0.0221809	0.0048021	11316
Total lipids in large VLDL	0.0653177	0.0212327	0.002096	0.0657101	0.022043	0.00287308	11316
Concentration of large VLDL particles	0.0706895	0.0225097	0.00168715	0.0692336	0.0232352	0.00288542	10511
Phospholipids in large VLDL	0.062516	0.0214598	0.00357775	0.0623536	0.0221852	0.00494506	11316
Triglycerides in large VLDL	0.066492	0.0212942	0.00179298	0.0668785	0.0220827	0.00245728	11316
Total cholesterol in medium HDL	0.00589175	0.0196641	0.764467	0.00555529	0.0238336	0.815694	11327
Cholesterol esters in medium HDL	0.00936853	0.019845	0.636865	0.00872713	0.0238834	0.714809	11327
Free cholesterol in medium HDL	-0.00048358	0.0196614	0.980378	-0.000960807	0.0256589	0.97013	11327
Total lipids in medium HDL	0.013668	0.0196666	0.487066	0.0140025	0.0219031	0.522633	11327
Concentration of medium HDL particles	0.0169792	0.0198445	0.392212	0.017449	0.0237292	0.462133	11327
Phospholipids in medium HDL	0.0118286	0.0199054	0.552349	0.0120636	0.0225829	0.593207	11327
Triglycerides in medium HDL	0.0705344	0.0219311	0.0012991	0.0708678	0.0222602	0.00145453	11327
Total cholesterol in medium LDL	0.00423074	0.0214894	0.843925	0.00368198	0.0214468	0.863689	11327
Cholesterol esters in medium LDL	0.00452632	0.0215971	0.833996	0.00416974	0.0215579	0.846629	11327
Free cholesterol in medium LDL	0.00368242	0.021059	0.861188	0.00268563	0.0210022	0.898249	11327
Total lipids in medium LDL	0.0084742	0.0213367	0.691245	0.00814381	0.0212935	0.702124	11327
Concentration of medium LDL particles	0.0123705	0.0214582	0.564281	0.0121043	0.021412	0.571866	11327
Phospholipids in medium LDL	0.0196337	0.0212544	0.355617	0.0198553	0.0212275	0.349604	11327
Triglycerides in medium LDL	0.0159555	0.021535	0.458748	0.0173457	0.0214336	0.418358	11327
Monounsaturated fatty acids; 16:1, 18:1	0.0506343	0.0217561	0.0199463	0.0505135	0.0220739	0.0221156	11094
Total cholesterol in medium VLDL	0.0610494	0.0215055	0.00452871	0.0619723	0.0220509	0.00494776	11327
Cholesterol esters in medium VLDL	0.0565113	0.0216061	0.00890899	0.0574686	0.0220107	0.00902923	11327
Free cholesterol in medium VLDL	0.0653277	0.0214947	0.00237176	0.0659928	0.0221319	0.00286564	11327
Total lipids in medium VLDL	0.0635797	0.0212081	0.00271854	0.0646026	0.02199	0.0033054	11327
Concentration of medium VLDL particles	0.0720398	0.0224536	0.00133485	0.0710665	0.0231699	0.00216083	10522
Phospholipids in medium VLDL	0.0664061	0.021392	0.00190764	0.0669143	0.0220975	0.00246066	11327
Triglycerides in medium VLDL	0.0655175	0.0212001	0.00199863	0.0663447	0.0220106	0.00257651	11327
Phosphatidylcholine and other cholines	0.0369464	0.0199807	0.0644423	0.0364404	0.0199306	0.0674951	11197
Phenylalanine	0.0202754	0.0205726	0.324351	0.0194464	0.0210398	0.355348	11245
Polyunsaturated fatty acids	0.0133864	0.0214241	0.532082	0.0140794	0.0213454	0.509512	11100
Pyruvate	-0.00346487	0.0271402	0.898414	-0.00732528	0.0451454	0.871101	5848
Remnant cholesterol (non-HDL, non-LDL -cholesterol)	0.0226248	0.0208719	0.278372	0.0241701	0.0210088	0.249948	11327
Serum total cholesterol	0.00442652	0.0205012	0.829054	0.00449756	0.02044	0.825842	11327
Serum total triglycerides	0.062477	0.0213668	0.00345541	0.0632445	0.02211	0.00423048	11327
Saturated fatty acids	0.0488675	0.021809	0.0250456	0.0485576	0.0219257	0.0267848	11093
Total cholesterol in small HDL	0.00433163	0.0217624	0.84223	0.00441747	0.021681	0.83855	11327
Cholesterol esters in small HDL	-0.00502702	0.0218616	0.818133	-0.00461704	0.0217983	0.832257	11327
Free cholesterol in small HDL	0.0299438	0.0212229	0.158268	0.0293552	0.0211518	0.165188	11327
Total lipids in small HDL	0.0399863	0.022259	0.072429	0.0387113	0.0222332	0.081657	11327
Concentration of small HDL particles	0.0438322	0.0222148	0.0484835	0.0426527	0.0222211	0.0549251	11327
Phospholipids in small HDL	0.0424108	0.022609	0.0606779	0.0415152	0.0225752	0.0659198	11327
Triglycerides in small HDL	0.057002	0.0218353	0.00903972	0.0566061	0.0225485	0.0120587	11327
Total cholesterol in small LDL	0.00358183	0.0213899	0.867013	0.00296599	0.0213524	0.889524	11327
Cholesterol esters in small LDL	0.00426174	0.0215218	0.84303	0.00377385	0.0214821	0.86055	11327
Free cholesterol in small LDL	0.00235854	0.0208436	0.909908	0.00149588	0.0208066	0.942686	11327
Total lipids in small LDL	0.0112806	0.0212369	0.595295	0.0109076	0.0211943	0.606798	11327
Concentration of small LDL particles	0.0143879	0.0213265	0.499899	0.0141997	0.0212818	0.504628	11327
Phospholipids in small LDL	0.0251936	0.0211575	0.233746	0.0250548	0.0211133	0.235351	11327
Triglycerides in small LDL	0.0447013	0.021854	0.0408107	0.0455476	0.0219713	0.0381677	11327
Sphingomyelins	-0.00651074	0.0193787	0.736891	-0.0066531	0.0193895	0.731502	11312
Total cholesterol in small VLDL	0.0300346	0.0204943	0.142782	0.0325763	0.0207895	0.117123	11327
Cholesterol esters in small VLDL	0.0184443	0.0205723	0.369954	0.0214536	0.0207525	0.301238	11327
Free cholesterol in small VLDL	0.0510015	0.0209033	0.014692	0.0520439	0.0213438	0.0147543	11327
Total lipids in small VLDL	0.0545339	0.0209442	0.00922023	0.0565517	0.0215758	0.00876545	11327
Concentration of small VLDL particles	0.0653789	0.0222044	0.00323564	0.0655452	0.0228496	0.00412367	10522
Phospholipids in small VLDL	0.0623683	0.0211917	0.00324997	0.0641763	0.02179	0.0032272	11327
Triglycerides in small VLDL	0.0687668	0.0214489	0.00134557	0.0692599	0.0221614	0.00177652	11327
3-hydroxybutyrate	-0.0399632	0.0246402	0.104831	-0.0361864	0.024513	0.139888	7484
Total cholines	0.0237222	0.0204904	0.246978	0.0238717	0.0204554	0.243205	11312
Total fatty acids	0.0400659	0.0215901	0.0634885	0.0401115	0.021669	0.0641545	11100
Total phosphoglycerides	0.0364594	0.0221721	0.100098	0.0381906	0.0220777	0.0836615	7999
Tyrosine	-0.00662641	0.0214158	0.757004	-0.00398558	0.0220066	0.856283	11328
Estimated degree of unsaturation	-0.0368832	0.0227757	0.105359	-0.0343088	0.0228987	0.134059	10206
Valine	-0.0175147	0.0205573	0.394217	-0.0221089	0.0278915	0.427967	11318
Total cholesterol in VLDL	0.040713	0.0209001	0.0514177	0.0427362	0.0213691	0.0455105	11327
Mean diameter for VLDL particles	0.0602762	0.0207013	0.00359451	0.0614893	0.0216286	0.00446966	11327
Triglycerides in VLDL	0.06416	0.0211369	0.00240174	0.0651385	0.0219965	0.00306332	11327
Total cholesterol in very large HDL	-0.0416751	0.0201185	0.038314	-0.0403696	0.0208301	0.0526184	11327
Cholesterol esters in very large HDL	-0.0416089	0.0201283	0.0387165	-0.0398581	0.0207577	0.0548385	11327
Free cholesterol in very large HDL	-0.0374992	0.0200171	0.0610192	-0.0379657	0.0208853	0.0690914	11327
Total lipids in very large HDL	-0.040819	0.0197908	0.0391584	-0.0412423	0.0207274	0.0466182	11327
Concentration of very large HDL particles	-0.0369811	0.019841	0.0623397	-0.0375379	0.0207818	0.0708728	11327
Phospholipids in very large HDL	-0.0368023	0.0196137	0.0606056	-0.0383582	0.020698	0.0638496	11327
Triglycerides in very large HDL	0.00316823	0.0222371	0.886705	0.00530304	0.0221423	0.81072	11327
Total cholesterol in very large VLDL	0.0571797	0.0215452	0.00795575	0.0576902	0.0221413	0.00917261	11318
Cholesterol esters in very large VLDL	0.05838	0.0215398	0.00672156	0.0589171	0.0221277	0.00775402	11318
Free cholesterol in very large VLDL	0.0550716	0.0215821	0.0107193	0.0555161	0.0221637	0.0122512	11318
Total lipids in very large VLDL	0.0579021	0.0214207	0.00686967	0.0581669	0.0221222	0.00855482	11318
Concentration of very large VLDL particles	0.0610243	0.0225326	0.00676356	0.0598425	0.0232193	0.0099583	10513
Phospholipids in very large VLDL	0.0562901	0.0216166	0.00921365	0.0562457	0.0222351	0.0114195	11318
Triglycerides in very large VLDL	0.057517	0.0214459	0.00731924	0.0576548	0.0221456	0.00922926	11318
Total cholesterol in very small VLDL	-0.000893655	0.0207595	0.965663	-0.000345546	0.0207039	0.986684	11326
Cholesterol esters in very small VLDL	-0.00609636	0.0210287	0.771887	-0.0050957	0.020969	0.807997	11326
Free cholesterol in very small VLDL	0.00937122	0.0204404	0.646618	0.00873093	0.0204391	0.669257	11326
Total lipids in very small VLDL	0.0168167	0.0208796	0.420581	0.0173003	0.0209271	0.40841	11326
Concentration of very small VLDL particles	0.0240457	0.0220134	0.274693	0.0241408	0.0221035	0.274758	10521
Phospholipids in very small VLDL	0.00877768	0.0213076	0.680376	0.00841764	0.0212797	0.692421	11326
Triglycerides in very small VLDL	0.0571639	0.0217879	0.00869908	0.0573658	0.0222503	0.00993153	11326
Total cholesterol in chylomicrons and extremely large VLDL	0.0531965	0.0216896	0.0141819	0.0538794	0.022242	0.0154176	11315
Cholesterol esters in chylomicrons and extremely large VLDL	0.053235	0.0217524	0.0143924	0.0542451	0.0222515	0.0147761	11315
Free cholesterol in chylomicrons and extremely large VLDL	0.0516437	0.02165	0.0170611	0.0518961	0.0222306	0.0195725	11315
Total lipids in chylomicrons and extremely large VLDL	0.0506218	0.0215343	0.0187356	0.0510569	0.0221597	0.0212201	11315
Concentration of chylomicrons and extremely large VLDL particles	0.0533993	0.022559	0.0179281	0.0526908	0.0232042	0.0231621	10510
Phospholipids in chylomicrons and extremely large VLDL	0.0527418	0.0216958	0.0150583	0.0525095	0.0222795	0.0184308	11315
Triglycerides in chylomicrons and extremely large VLDL	0.0489307	0.0215137	0.0229422	0.0493437	0.0221396	0.0258304	11315

## Sheet: Table S8
Table S8: Mendelian Randomization results for insomnia symptoms
	Inverse-Variance Weighted			Weighted-Median Estimator			MR-Egger			MR-Egger intercept	MAGNETIC Q	NEO Q	OBB Q	PROSPER Q
	beta	se	pval	beta	se	pval	beta	se	pval	pval	pval	pval	pval	pval
Acetoacetate	0.0292123	0.0186351	0.116976	0.0171469	0.0277231	0.536242	0.0753372	0.0691996	0.276288	0.420281	0.434949		0.0221656	0.867347
Acetate	-0.00623315	0.015591	0.68931	0.00575828	0.0234187	0.805772	0.113016	0.058236	0.0523001	0.0405891	0.519555	0.651176	0.56084	0.876644
Alanine	-0.00972483	0.0165924	0.557808	-0.00992514	0.0247665	0.688605	-0.135869	0.0618808	0.0281168	0.0306555	0.0417371	0.193199	0.746099	0.51655
Albumin	0.00878652	0.0174537	0.61467	-0.0102141	0.025606	0.68997	0.0291346	0.0645687	0.651832	0.65935	0.117771	0.0869803	0.730434	0.52789
Apolipoprotein A-I	-0.0215181	0.0173609	0.215175	-0.013034	0.0251557	0.604367	0.0210835	0.0646401	0.744298	0.558343	0.313076	0.0581357	0.108225	0.715056
Apolipoprotein B	0.0085502	0.0221284	0.699207	0.0154068	0.0245776	0.530749	-0.0259308	0.0827194	0.753916	0.617272	2.27633e-16	1.48243e-07	7.00128e-06	0.0565325
3-hydroxybutyrate	0.0078697	0.0168459	0.640387	-0.00947482	0.0245242	0.699241	0.0372851	0.0629733	0.553799	0.589209	0.268476	0.000101485	0.0294488	0.733696
Citrate	-0.0342087	0.0160307	0.0328471	-0.0356743	0.0234502	0.12819	-0.047078	0.0602412	0.434513	0.733202	0.400937	0.463621	0.023972	0.272863
Creatinine	-0.0145932	0.0159667	0.360726	0.00691482	0.0228606	0.762287	-0.0047078	0.059829	0.937281	0.947466	0.129353	0.0111023	0.0525696	0.474294
22:6, docosahexaenoic acid	-0.0022174	0.0202498	0.912804	-0.0106684	0.0280997	0.704196	0.100034	0.0751038	0.18288	0.172731	0.000755943	0.426222	0.0339439	0.247974
Esterified cholesterol	-0.0188973	0.0222319	0.39532	-0.00257558	0.0274216	0.925169	-0.0126263	0.0825654	0.878458	0.944216	1.96881e-06	3.4837e-07	0.016182	0.00311055
Estimated description of fatty acid chain length, not actual carbon number	-0.0288283	0.0216576	0.183158	-0.0345368	0.033261	0.299105	-0.0103309	0.079984	0.897229	0.802524	0.817568	0.241285		0.306226
Omega-3 fatty acids	-0.0117475	0.0197853	0.55268	0.00217421	0.0287024	0.939618	0.0892097	0.0731103	0.222387	0.160461	0.106332	0.0475334	0.0174043	0.211516
Omega-6 fatty acids	-0.0169607	0.0220091	0.44093	0.0153663	0.0289193	0.595174	0.099658	0.0815075	0.221449	0.177455	1.4688e-06	2.84388e-05	0.0331717	0.00787544
Free cholesterol	-0.0065166	0.0212804	0.759433	-0.00448349	0.0274265	0.870146	0.0161278	0.0788983	0.838032	0.848362	0.000662946	7.64031e-05	0.0137528	0.00945105
Glucose	0.0317189	0.0165358	0.0550866	0.0201647	0.0231579	0.383893	-0.0706028	0.0614957	0.250931	0.0785892	0.0500033	0.572029	0.131966	0.394388
Glutamine	-0.0262253	0.016227	0.106061	-0.0123651	0.0230143	0.591076	-0.0110316	0.0605764	0.855496	0.865403	0.242829	0.0991038	0.255369	0.0328961
Glycerol	-0.0142589	0.0190319	0.453732	-0.0598976	0.0278654	0.0315925	-0.0512649	0.0707937	0.468976	0.534212	0.803106		0.192553
Glycine	0.00303588	0.0194375	0.875886	-0.0206484	0.0281139	0.46267	-0.034585	0.0717779	0.629924	0.599091	0.850304		0.102195
Glycoprotein acetyls, mainly a1-acid glycoprotein	0.0621656	0.0180933	0.000590726	0.0543816	0.0258349	0.0352945	0.0176997	0.0673276	0.792636	0.474751	0.0147133	0.140046	0.158697	0.506987
Total cholesterol in HDL	-0.0193065	0.0167582	0.249294	-0.0276704	0.024421	0.25719	0.00632839	0.0625985	0.919475	0.700507	0.247906	0.0996958	0.0493397	0.749857
Mean diameter for HDL particles	-0.0447634	0.0179201	0.0124915	-0.00250398	0.0243241	0.918009	0.0376039	0.0664711	0.571585	0.238754	0.002269	0.144891	0.110751	0.641094
Histidine	0.000273545	0.0170568	0.987205	-0.0234108	0.0253137	0.355055	0.0158734	0.0633856	0.802258	0.720576	0.311335	0.188701	0.762895	0.0325685
Total cholesterol in IDL	-0.00895926	0.0219655	0.683363	0.00552567	0.0246895	0.822908	-0.0316186	0.081682	0.698687	0.719086	5.00252e-13	7.3982e-08	0.00101742	0.00200286
Free cholesterol in IDL	-0.0151973	0.0209696	0.468619	0.0112229	0.0245919	0.648126	-0.035029	0.0781775	0.654102	0.730824	3.26916e-11	2.87493e-06	0.0127936	0.00512149
Total lipids in IDL	-0.00242728	0.0218955	0.911729	-0.00307611	0.0245577	0.900317	-0.0245346	0.0814252	0.763175	0.724402	5.13901e-13	3.17425e-07	0.00145237	0.00210937
Concentration of IDL particles	-0.000314408	0.0218203	0.988504	-0.0069326	0.0245895	0.777995	-0.0214606	0.0811404	0.791405	0.735691	1.60155e-12	2.90655e-07	0.001346	0.00230916
Phospholipids in IDL	-0.00748668	0.0213813	0.726226	-0.00106983	0.0244344	0.965077	-0.0181388	0.0798094	0.820209	0.835803	2.72415e-13	1.90404e-06	0.00468824	0.00194388
Triglycerides in IDL	0.0260132	0.0193962	0.179871	0.0198347	0.0249554	0.426726	0.0663447	0.0720571	0.357195	0.553555	6.50219e-07	0.0162096	0.296293	0.471832
Isoleucine	0.0221956	0.0161304	0.168818	0.0292772	0.0220448	0.184153	0.0154381	0.0603923	0.798236	0.836094	0.0642369	0.188788	0.0508496	0.778258
Total cholesterol in large HDL	-0.0371769	0.0179813	0.0386843	-0.00773129	0.0247683	0.75493	0.0198896	0.0671714	0.767153	0.391795	0.00254124	0.0488926	0.0102677	0.811074
Cholesterol esters in large HDL	-0.0356166	0.0183881	0.0527524	-0.0202564	0.0244243	0.406905	0.0502796	0.0683338	0.461856	0.203779	0.0019518	0.0451189	0.0079174	0.803177
Free cholesterol in large HDL	-0.038259	0.0173462	0.0274112	0.00280651	0.0245026	0.90881	0.00864564	0.064784	0.893835	0.46162	0.0374904	0.0637747	0.0205229	0.836249
Total lipids in large HDL	-0.0356987	0.0180543	0.0480077	-0.0162328	0.0244332	0.50645	0.0426153	0.067085	0.52527	0.229472	0.0134343	0.042858	0.00916055	0.782499
Concentration of large HDL particles	-0.035063	0.0180694	0.0523234	-0.0153833	0.0244737	0.529633	0.0431034	0.0671295	0.520812	0.22829	0.0133183	0.04148	0.00864453	0.771387
Phospholipids in large HDL	-0.0312796	0.017861	0.0798981	-0.0149088	0.0243314	0.540049	0.0449087	0.0663614	0.498578	0.232442	0.033705	0.0419816	0.0106867	0.735172
Total cholesterol in large LDL	-0.0116748	0.0227828	0.608343	-0.00442896	0.024315	0.855465	-0.035334	0.0851154	0.678046	0.714126	5.62444e-21	3.63659e-08	4.66767e-05	0.0020586
Cholesterol esters in large LDL	-0.00685035	0.0232918	0.768674	0.00291949	0.0248358	0.906423	-0.0299418	0.086694	0.729813	0.731578	5.95462e-21	1.40698e-08	1.55338e-05	0.00195876
Free cholesterol in large LDL	-0.0161385	0.0223422	0.470091	0.0111176	0.0248182	0.654181	-0.0383873	0.0834511	0.645518	0.719544	1.58582e-19	4.91051e-07	0.0011843	0.00259062
Total lipids in large LDL	-0.00594507	0.0232173	0.797902	0.00565735	0.0244848	0.817271	-0.0249562	0.0864208	0.772753	0.766599	1.29141e-21	6.25479e-08	9.39803e-05	0.00189635
Concentration of large LDL particles	-0.00448491	0.0231706	0.84652	0.0101516	0.0249221	0.683764	-0.0238914	0.0862452	0.781767	0.761443	3.38583e-21	5.64187e-08	9.5051e-05	0.00209157
Phospholipids in large LDL	-0.00795922	0.0225606	0.724243	0.0051968	0.0243404	0.830933	-0.0317793	0.084279	0.70612	0.705934	1.38129e-20	1.26887e-07	0.000322893	0.0025902
Total cholesterol in large VLDL	0.0147097	0.0177119	0.406257	0.0156071	0.0244741	0.523672	-0.0422613	0.0660313	0.52216	0.345736	0.00399186	0.336455	0.123473	0.718085
Cholesterol esters in large VLDL	0.0229466	0.017745	0.195965	0.0106947	0.0250364	0.669257	-0.0204747	0.0660242	0.756478	0.489756	0.0274936	0.300378	0.0891643	0.693269
Free cholesterol in large VLDL	0.0176684	0.0178802	0.323076	0.0158725	0.0249061	0.523933	-0.03202	0.0668244	0.631821	0.397866	0.000681938	0.309511	0.175118	0.735184
Total lipids in large VLDL	0.025278	0.0180004	0.160229	0.0278985	0.0257601	0.278802	-0.0379844	0.066979	0.57064	0.308877	0.00345581	0.366152	0.134798	0.693642
Concentration of large VLDL particles	0.0259001	0.0178153	0.145999	0.0148207	0.0254309	0.560039	-0.0211224	0.0663191	0.750108	0.458744	0.00874492	0.373165	0.136655	0.688529
Phospholipids in large VLDL	0.0196193	0.0179154	0.273469	0.00942428	0.0255981	0.712752	-0.0380477	0.0668438	0.569218	0.350324	0.00124528	0.291565	0.110926	0.658899
Triglycerides in large VLDL	0.0232546	0.017405	0.18152	0.029223	0.0247919	0.238504	-0.0376656	0.0650107	0.562336	0.308842	0.0126888	0.398725	0.157034	0.692569
18:2, linoleic acid	-0.0284046	0.0224935	0.206663	0.0206677	0.0286582	0.4708	0.105208	0.0833154	0.206671	0.126408	3.74314e-08	2.95824e-06	0.0140997	0.00817682
Lactate	0.014834	0.0171147	0.386085	0.00647858	0.0237941	0.785409	-0.107042	0.0634728	0.0917148	0.0415597	0.00133163	0.461617	0.616897	0.826284
Total cholesterol in LDL	-0.00534063	0.0233871	0.819368	0.00715447	0.0243463	0.768863	-0.0485195	0.0873708	0.57867	0.545896	1.23774e-26	2.45202e-08	1.77973e-05	0.00248205
Mean diameter for LDL particles	-0.00595356	0.0184186	0.746516	0.003872	0.0257818	0.88062	0.0228278	0.0685166	0.739004	0.593781	0.0152644	0.407872	0.000238873	0.973323
Leucine	0.0236141	0.0153481	0.123911	0.0199366	0.0219941	0.364695	-0.00320173	0.0574777	0.955578	0.554289	0.502778	0.69557	0.0306096	0.267882
Total cholesterol in medium HDL	0.00506269	0.0178521	0.776724	0.000572392	0.0245395	0.981391	-0.022153	0.0669251	0.740636	0.674077	0.0586101	0.0427458	0.0020299	0.385943
Cholesterol esters in medium HDL	0.00736264	0.0182657	0.686885	-0.00238228	0.0254062	0.925294	0.00728493	0.0678827	0.914538	0.996233	0.0645131	0.0348625	0.00169786	0.445437
Free cholesterol in medium HDL	0.00493601	0.0167667	0.768457	-0.0225867	0.0246904	0.360298	-0.0378936	0.0625087	0.544374	0.516179	0.598206	0.0934588	0.00645702	0.171024
Total lipids in medium HDL	0.00911735	0.0174689	0.601726	0.00469004	0.0254998	0.854073	0.00185403	0.064967	0.977233	0.956098	0.368069	0.0510751	0.00344099	0.360377
Concentration of medium HDL particles	0.0122891	0.0172927	0.477298	0.00285692	0.0258501	0.911998	0.000748445	0.0643026	0.990713	0.912982	0.472415	0.0489738	0.00369799	0.378791
Phospholipids in medium HDL	0.0129907	0.0167591	0.438253	0.00113797	0.0250222	0.963726	-0.00831375	0.0625273	0.894223	0.779719	0.505251	0.0761312	0.00628718	0.325865
Total cholesterol in medium LDL	-0.00326712	0.0233742	0.888838	0.00953841	0.0242967	0.69463	-0.0472869	0.0873013	0.588058	0.548023	1.10406e-25	6.64249e-09	8.58721e-06	0.00322178
Cholesterol esters in medium LDL	-0.00525307	0.023505	0.823156	0.00162325	0.0245704	0.947326	-0.0358012	0.0874904	0.682392	0.669992	6.57437e-23	9.44946e-09	1.02649e-05	0.00325369
Total lipids in medium LDL	-0.00715234	0.0238099	0.763877	0.00827162	0.0250365	0.741111	-0.035912	0.0886617	0.685444	0.681396	7.95848e-25	3.60439e-09	6.35854e-06	0.00263749
Concentration of medium LDL particles	-0.00265427	0.023673	0.910726	0.0101233	0.0246631	0.681466	-0.026926	0.0881236	0.759949	0.724661	4.30551e-24	6.42443e-09	7.26419e-06	0.00310733
Phospholipids in medium LDL	-0.00111425	0.0231452	0.961603	0.0097598	0.0242017	0.686751	-0.0369171	0.0864764	0.669449	0.603183	2.1585e-23	6.54024e-09	8.13682e-06	0.00601522
Total cholesterol in medium VLDL	0.014433	0.018643	0.438828	0.0392025	0.0248397	0.114515	-0.0266237	0.0696495	0.702274	0.536931	3.38171e-05	0.0065573	0.0518198	0.601733
Cholesterol esters in medium VLDL	0.0126645	0.0192726	0.5111	0.0407038	0.0247706	0.100335	-0.0257023	0.0716882	0.719947	0.574649	2.87354e-05	0.00169709	0.0231657	0.480821
Free cholesterol in medium VLDL	0.0223923	0.0181168	0.216459	0.0240371	0.0249104	0.334573	-0.0275179	0.0676686	0.68426	0.431572	0.000710492	0.021341	0.110358	0.751107
Total lipids in medium VLDL	0.0253859	0.018477	0.169466	0.0347223	0.0252216	0.168609	-0.0358234	0.0687167	0.602144	0.350232	0.000693591	0.0220104	0.0554149	0.69187
Concentration of medium VLDL particles	0.0280156	0.0183571	0.126975	0.0282499	0.0252231	0.262714	-0.0222441	0.0682969	0.744653	0.451358	0.00140321	0.0244339	0.0552497	0.691742
Phospholipids in medium VLDL	0.0222684	0.0181349	0.219474	0.0249252	0.024799	0.314854	-0.0337259	0.0677326	0.618536	0.387965	0.0012985	0.0146221	0.0443881	0.664057
Triglycerides in medium VLDL	0.0234069	0.0174685	0.180262	0.0290447	0.024591	0.23756	-0.0328393	0.0652277	0.614644	0.362516	0.02593	0.0411739	0.0729632	0.725214
Monounsaturated fatty acids; 16:1, 18:1	0.0282133	0.019272	0.143207	0.0134708	0.0275164	0.624448	-0.0138673	0.0714686	0.84615	0.52241	0.0564467	0.0123576	0.545684	0.527459
Polyunsaturated fatty acids	0.00141313	0.0205121	0.945075	0.0158577	0.0277788	0.568096	0.062145	0.0759137	0.412999	0.442091	0.0300179	3.53403e-05	0.0365152	0.00707691
Phosphatidylcholine and other cholines	-0.00705809	0.0190099	0.710426	-0.0321332	0.027969	0.250603	0.0409477	0.0705206	0.561478	0.548576	0.20148	0.0624734	0.501949	0.203166
Phenylalanine	0.0265138	0.0164854	0.107764	0.0164113	0.0245317	0.503506	0.00438943	0.0615384	0.943136	0.733009	0.218203	0.55425	0.249495	0.314642
Pyruvate	0.00970516	0.0175473	0.580204	-0.0130523	0.0255255	0.60911	-0.213929	0.0642028	0.000862002	0.000364205	0.145586		0.206781	0.344507
Total lipids in small HDL	0.0390518	0.0176669	0.0270739	0.0386853	0.0260357	0.137316	-0.0178492	0.0656231	0.785625	0.418398	0.0597482	0.240314	0.494002	0.0788254
Concentration of small HDL particles	0.0413093	0.0177436	0.0199057	0.0406291	0.0262839	0.122157	-0.0156598	0.0659854	0.812407	0.410939	0.0449416	0.238986	0.459665	0.0737199
Triglycerides in small HDL	0.0364676	0.0198848	0.0666617	0.0298963	0.0250103	0.231947	-0.0351452	0.0742505	0.635976	0.348696	1.98514e-05	0.000264881	0.00263835	0.000567238
Total cholesterol in small LDL	-0.0046182	0.0233029	0.842903	0.0151772	0.0232721	0.514296	-0.0398279	0.0870802	0.647405	0.621453	9.77136e-25	1.37835e-08	4.64264e-06	0.00291262
Total lipids in small LDL	-0.00661182	0.0237939	0.781106	0.022752	0.0251353	0.365368	-0.035778	0.0886001	0.68635	0.667865	3.50697e-25	7.74356e-09	3.35536e-06	0.00354832
Concentration of small LDL particles	-0.00286391	0.0235578	0.90324	0.0281384	0.0243591	0.248028	-0.0292462	0.0877125	0.738808	0.685892	1.16481e-22	7.76947e-09	3.21123e-06	0.00382394
Total cholesterol in small VLDL	0.0154456	0.0193656	0.425115	0.00409568	0.0246472	0.868021	-0.0282531	0.0722282	0.695676	0.516455	1.10456e-06	0.000302158	0.010867	0.257629
Free cholesterol in small VLDL	0.0242287	0.0192639	0.208492	0.0238734	0.0246678	0.333148	-0.0210591	0.0718557	0.769465	0.501791	9.72485e-08	0.00394215	0.0562824	0.678191
Total lipids in small VLDL	0.0297491	0.0194231	0.125612	0.0222912	0.0254567	0.381219	-0.0179997	0.072232	0.803212	0.49328	8.17593e-07	0.00596754	0.0214286	0.745679
Concentration of small VLDL particles	0.0317013	0.0192521	0.0996319	0.0310655	0.0258783	0.229967	-0.0195883	0.0716062	0.784426	0.458658	3.40072e-06	0.00878908	0.022058	0.771294
Phospholipids in small VLDL	0.0286289	0.0188809	0.129446	0.0135715	0.024277	0.576145	-0.0194588	0.0704903	0.78251	0.483152	2.68648e-06	0.0130119	0.0385921	0.850938
Triglycerides in small VLDL	0.0345513	0.0183611	0.0598683	0.02938	0.0242964	0.226575	-0.00809849	0.0684992	0.905887	0.51179	0.00011926	0.0380255	0.0592856	0.846457
Serum total cholesterol	-0.0119687	0.0214884	0.577538	-0.0114586	0.0244271	0.639003	-0.0171476	0.0801849	0.830663	0.875146	8.70649e-14	1.64045e-06	0.00359944	0.00316772
Serum total triglycerides	0.0287847	0.0187717	0.125174	0.0282032	0.0249752	0.258794	-0.00494446	0.0701151	0.94378	0.610083	1.67683e-06	0.0312075	0.115174	0.723417
Sphingomyelins	-0.0332373	0.0188393	0.0776894	-0.0305621	0.0272339	0.261775	0.00906773	0.069754	0.89657	0.694216	0.630679	0.00577975	0.0847519	0.764868
Total fatty acids	0.0052448	0.0204454	0.797544	0.0286328	0.0287777	0.319752	0.0376519	0.0759191	0.619931	0.762782	0.00234079	0.000768878	0.213989	0.0900855
Total phosphoglycerides	-0.0054544	0.0191435	0.775704	-0.0274278	0.0274974	0.318538	0.0423473	0.0710177	0.55098	0.575342	0.0685792	0.249895	0.435271	0.340554
Tyrosine	0.0299652	0.0161289	0.0631898	0.00434207	0.0234582	0.853152	-0.00932128	0.0603118	0.877175	0.562833	0.244535	0.355859	0.023918	0.857862
Valine	0.0219876	0.016022	0.169958	0.0167561	0.0233923	0.4738	-0.0287115	0.059911	0.631771	0.330127	0.0961501	0.382521	0.0678913	0.660054
Mean diameter for VLDL particles	0.020997	0.0169742	0.216088	0.00423648	0.0246866	0.863744	-0.0474666	0.063105	0.45194	0.26432	0.236279	0.18727	0.194747	0.500889
Total cholesterol in very large HDL	-0.0376526	0.0167846	0.0248783	-0.0359505	0.0240432	0.134849	0.00925085	0.0626735	0.882655	0.561479	0.184829	0.00667386	0.315531	0.62816
Cholesterol esters in very large HDL	-0.0339955	0.0172212	0.048376	-0.0431466	0.0251038	0.0856642	0.0122313	0.0639446	0.848307	0.597887	0.221762	0.00237889	0.315833	0.581165
Free cholesterol in very large HDL	-0.0475491	0.0165739	0.00411877	-0.0464271	0.0234718	0.0479293	0.00383784	0.0618789	0.950545	0.492256	0.197603	0.0266398	0.318603	0.767566
Total lipids in very large HDL	-0.0452488	0.0169317	0.00753056	-0.039327	0.0250944	0.117077	0.0231364	0.0628222	0.712662	0.332887	0.17166	0.0433218	0.419702	0.7481
Concentration of very large HDL particles	-0.0545437	0.0167107	0.00109847	-0.0364894	0.0243629	0.134199	-0.00579056	0.0620193	0.925612	0.526501	0.268802	0.0435245	0.426113	0.740436
Phospholipids in very large HDL	-0.0502319	0.0167926	0.00277781	-0.0240854	0.0243634	0.322863	0.0220437	0.0623424	0.723646	0.269246	0.141215	0.101583	0.430863	0.866168
Triglycerides in very large HDL	-0.0346122	0.0179479	0.0537951	-0.0212106	0.0247933	0.392275	-0.0187571	0.0669983	0.779506	0.876898	0.00658275	0.00125251	0.66783	0.68487
Total lipids in very large VLDL	0.0216692	0.0184273	0.239623	0.0143821	0.0256493	0.574989	-0.0319618	0.0685266	0.640918	0.358648	0.000285289	0.329107	0.200616	0.454327
Concentration of very large VLDL particles	0.022013	0.0183953	0.231438	0.0218017	0.0251578	0.386162	-0.0127427	0.0681177	0.851607	0.553595	0.00265055	0.335054	0.200772	0.46086
Phospholipids in very large VLDL	0.017968	0.0183952	0.328678	0.0329931	0.0247749	0.182953	-0.0228159	0.0686664	0.739684	0.473964	4.13465e-05	0.290995	0.190755	0.42639
Triglycerides in very large VLDL	0.0198403	0.0177911	0.264774	0.0205138	0.0249484	0.410935	-0.0341807	0.0662528	0.605915	0.337474	0.00322243	0.361827	0.207172	0.46008
Total lipids in very small VLDL	0.0173718	0.0194752	0.372398	0.0192086	0.024462	0.432311	-0.00750473	0.0723188	0.91735	0.696355	0.000425773	3.24554e-05	0.00504235	0.10953
Concentration of very small VLDL particles	0.0183942	0.0197443	0.35153	0.0237506	0.0252862	0.347591	-0.0118527	0.0731826	0.871336	0.650511	9.84328e-05	4.63217e-05	0.00499642	0.160055
Phospholipids in very small VLDL	0.0127831	0.020384	0.530583	0.000627762	0.025366	0.980256	0.00573374	0.0756316	0.939569	0.887264	9.52948e-07	3.24299e-05	0.00532755	0.0179753
Triglycerides in very small VLDL	0.0355431	0.0188913	0.0599102	0.0217042	0.0253533	0.391961	0.0248411	0.0702139	0.723495	0.890294	7.08237e-05	0.0336448	0.088802	0.808446
Total lipids in chylomicrons and extremely large VLDL	0.0175829	0.0190354	0.355644	0.0138418	0.0263854	0.59986	-0.0591534	0.0706919	0.402718	0.223196	0.000111169	0.0586599	0.0791544	0.254398
Concentration of chylomicrons and extremely large VLDL particles	0.017848	0.0185724	0.336556	0.0152174	0.0261828	0.561106	-0.0530318	0.0687648	0.440585	0.2609	0.00961245	0.0584434	0.0732393	0.246531
Phospholipids in chylomicrons and extremely large VLDL	0.0260731	0.0184152	0.15682	0.0229288	0.0250537	0.360095	-0.0480066	0.0686711	0.484502	0.223895	0.000236855	0.056131	0.13386	0.299344
Triglycerides in chylomicrons and extremely large VLDL	0.0229204	0.0187649	0.221917	0.00159883	0.0256223	0.950244	-0.0726268	0.0697486	0.297753	0.130879	7.19773e-05	0.0578605	0.0650998	0.236509

## Sheet: Table S9
Table S9: Multivariable-adjusted results for total sleep duration
	Fixed effect model			Random effect model
	beta	se	pval	beta	se	pval	Total N
Acetate	0.00427439	0.00734121	0.5604	-0.00177555	0.0136065	0.896176	13463
Acetoacetate	0.000648694	0.00858756	0.939786	0.00147744	0.0109224	0.8924	8872
Alanine	0.00909131	0.00646347	0.159556	0.00660438	0.00856869	0.440851	17366
Albumin	-0.00892273	0.00715827	0.212584	-0.00630459	0.00713491	0.376899	13967
Apolipoprotein A-I	-0.00806237	0.00530026	0.128227	-0.00384039	0.00538501	0.475745	17367
Apolipoprotein B	0.0110833	0.00635727	0.0812616	0.00694313	0.00638564	0.276902	17365
Citrate	-0.0070433	0.00637577	0.269291	-0.00542134	0.00636691	0.394499	17364
Conjugated linoleic acid	0.022241	0.00822847	0.00687296	0.0212911	0.0101783	0.0364555	10396
Creatinine	0.0196782	0.00607539	0.00119951	0.0196247	0.00817457	0.0163636	13963
Diacylglycerol	0.0107425	0.00695781	0.1226	0.0085071	0.00751312	0.257509	13716
22:6, docosahexaenoic acid	0.0203799	0.0060558	0.000764449	0.0203625	0.00604626	0.000757757	17107
Esterified cholesterol	-0.00347261	0.00614182	0.571799	-0.00226214	0.00610621	0.711035	17326
Estimated description of fatty acid chain length, not actual carbon number	0.00996449	0.00764481	0.192427	0.0082119	0.00762766	0.281661	12873
Omega-3 fatty acids	0.0178199	0.00633437	0.00490499	0.0177353	0.00630382	0.0049018	17116
Omega-6 fatty acids	0.00352704	0.00636126	0.579266	0.00272433	0.00633253	0.667042	17116
Free cholesterol	0.00584741	0.0061439	0.341227	0.00614076	0.00610583	0.31455	17338
Glucose	-0.00505712	0.00622752	0.416757	-0.00992877	0.00959614	0.300827	17361
Glutamine	-0.0162956	0.00698227	0.0196035	-0.0124787	0.0072444	0.0849738	13926
Glycoprotein acetyls, mainly a1-acid glycoprotein	0.0124377	0.00690042	0.071473	0.00242965	0.00715981	0.734349	13965
Total cholesterol in HDL2	-0.0135484	0.0056383	0.0162646	-0.00693704	0.00617078	0.260938	17367
Total cholesterol in HDL3	-0.00347125	0.00634253	0.584174	-0.000995771	0.0101775	0.922059	17367
Total cholesterol in HDL	-0.012804	0.00562714	0.022882	-0.00615433	0.00582686	0.290877	17367
Mean diameter for HDL particles	-0.00135939	0.00562765	0.809125	0.00749951	0.00592402	0.205531	17367
Triglycerides in HDL	0.0230478	0.0065721	0.000453333	0.0212641	0.00745292	0.00432912	17367
Histidine	-0.00918734	0.00642976	0.153039	-0.00809591	0.00638911	0.205104	17334
Total cholesterol in IDL	0.000114305	0.00629321	0.985509	0.00068131	0.00625334	0.913241	17369
Cholesterol esters in IDL	0.000821834	0.00632872	0.896679	0.000722287	0.00628951	0.908572	17369
Free cholesterol in IDL	-0.000329948	0.00619999	0.957559	0.00186355	0.00617255	0.762722	17369
Total lipids in IDL	0.00229289	0.00631444	0.716517	0.00255719	0.00627421	0.683588	17367
Concentration of IDL particles	0.0032376	0.00633325	0.609207	0.00314577	0.0062919	0.617095	17367
Phospholipids in IDL	-0.00049722	0.00634477	0.937536	0.000485153	0.00630779	0.938693	17369
Triglycerides in IDL	0.0170885	0.0065346	0.00892069	0.0143518	0.00664887	0.0308861	17369
Isoleucine	0.0108611	0.00576279	0.059471	0.00260449	0.00600912	0.664708	17358
18:2, linoleic acid	0.00185048	0.00641882	0.773125	0.00162306	0.00640558	0.799973	17114
Lactate	0.00757354	0.00646383	0.241325	0.00700413	0.0112297	0.532814	17367
Total cholesterol in LDL	-0.00188745	0.00640325	0.768174	-0.00161912	0.00636752	0.799281	17367
Mean diameter for LDL particles	0.0153273	0.00638434	0.0163608	0.0194429	0.00814343	0.0169608	17367
Triglycerides in LDL	0.0125151	0.00648167	0.0535016	0.0134308	0.00826246	0.104052	17367
Leucine	-0.00213381	0.00555239	0.700753	-0.00907261	0.00571906	0.112653	17362
Total cholesterol in large HDL	-0.00611176	0.0057095	0.284414	0.00197432	0.00597924	0.741252	17357
Cholesterol esters in large HDL	-0.00607689	0.00571552	0.287679	0.00203944	0.00598236	0.733172	17357
Free cholesterol in large HDL	-0.00634216	0.00570277	0.266087	0.00182504	0.00598388	0.760371	17357
Total lipids in large HDL	-0.00602694	0.00571053	0.291239	0.00121711	0.00594924	0.837898	17357
Concentration of large HDL particles	-0.00582186	0.00569618	0.306751	0.00165893	0.00625446	0.790825	17357
Phospholipids in large HDL	-0.00743306	0.00573817	0.195192	-0.000484182	0.00686865	0.943802	17357
Triglycerides in large HDL	0.0130864	0.00579563	0.0239471	0.0197673	0.00594291	0.0008804	17357
Total cholesterol in large LDL	-0.00157884	0.00639798	0.805086	-0.00124892	0.00636175	0.844362	17369
Cholesterol esters in large LDL	-0.000345839	0.00640645	0.956949	-0.000445133	0.00637131	0.944301	17369
Free cholesterol in large LDL	-0.00383075	0.00633199	0.545189	-0.00222886	0.00629963	0.723482	17369
Total lipids in large LDL	-0.000725356	0.00641114	0.90992	-0.000628043	0.00637431	0.921514	17369
Concentration of large LDL particles	0.000845958	0.00639846	0.894816	0.000758602	0.00636034	0.905061	17369
Phospholipids in large LDL	-0.00136831	0.00642964	0.831472	-0.00143698	0.00639366	0.822174	17369
Triglycerides in large LDL	0.0119151	0.00648813	0.0662924	0.0128591	0.00786024	0.101846	17369
Total cholesterol in large VLDL	0.0179122	0.00647209	0.00564707	0.0110064	0.00676618	0.103804	17334
Cholesterol esters in large VLDL	0.0183777	0.00648374	0.00459076	0.0119115	0.00706612	0.0918497	17334
Free cholesterol in large VLDL	0.0167584	0.00648012	0.00970607	0.00978634	0.00659746	0.137981	17334
Total lipids in large VLDL	0.0170071	0.00639332	0.00781094	0.00904962	0.00655323	0.167298	17334
Concentration of large VLDL particles	0.0168538	0.0066107	0.0107885	0.00960808	0.00673343	0.153603	16530
Phospholipids in large VLDL	0.0155308	0.00646129	0.0162314	0.00823976	0.00659466	0.211497	17334
Triglycerides in large VLDL	0.0159406	0.006397	0.0127067	0.00812308	0.00654864	0.214819	17334
Total cholesterol in medium HDL	-0.0168276	0.00595416	0.00471041	-0.012829	0.00762626	0.0925275	17370
Cholesterol esters in medium HDL	-0.0187464	0.00602416	0.00185909	-0.0145692	0.00819164	0.0753133	17370
Free cholesterol in medium HDL	-0.0095745	0.00577266	0.0971978	-0.00611052	0.00604202	0.311855	17370
Total lipids in medium HDL	-0.0131123	0.00584756	0.0249388	-0.0097154	0.00741081	0.189865	17370
Concentration of medium HDL particles	-0.0126091	0.00586688	0.0316186	-0.00902831	0.00776166	0.244751	17370
Phospholipids in medium HDL	-0.0116902	0.0058542	0.0458381	-0.00785449	0.00776964	0.312055	17370
Triglycerides in medium HDL	0.0122087	0.00647396	0.0593197	0.00786233	0.00693567	0.256959	17370
Total cholesterol in medium LDL	-0.00144492	0.00640444	0.821503	-0.0012387	0.00636976	0.845811	17370
Cholesterol esters in medium LDL	-0.000549069	0.00640831	0.93172	-0.00042342	0.00637741	0.947064	17370
Free cholesterol in medium LDL	-0.00346684	0.00639151	0.587534	-0.00301868	0.00634641	0.634323	17370
Total lipids in medium LDL	-0.000579629	0.00641372	0.927991	-0.00082327	0.00637848	0.897302	17370
Concentration of medium LDL particles	0.0006726	0.00641339	0.916475	0.000373791	0.00637849	0.953269	17370
Phospholipids in medium LDL	-0.000239338	0.00647073	0.970495	-0.00181813	0.00644165	0.777754	17370
Triglycerides in medium LDL	0.0094697	0.00644216	0.141573	0.0110371	0.00795482	0.165298	17370
Monounsaturated fatty acids; 16:1, 18:1	0.0170043	0.00656712	0.00961703	0.0123253	0.00662337	0.0627603	17060
Total cholesterol in medium VLDL	0.0198656	0.00646489	0.00212034	0.0135451	0.00713471	0.0576339	17370
Cholesterol esters in medium VLDL	0.0202893	0.00650769	0.00182238	0.0146438	0.00680559	0.0314191	17370
Free cholesterol in medium VLDL	0.018005	0.00643878	0.00516855	0.0113064	0.00738047	0.125539	17370
Total lipids in medium VLDL	0.0178932	0.00635436	0.0048642	0.0101065	0.00686274	0.140843	17370
Concentration of medium VLDL particles	0.0175178	0.00657359	0.0077018	0.0104187	0.00696616	0.134754	16566
Phospholipids in medium VLDL	0.0162635	0.00642536	0.0113694	0.00886423	0.00656492	0.176939	17370
Triglycerides in medium VLDL	0.0159716	0.00632901	0.0116174	0.00807347	0.00682193	0.236627	17370
Phosphatidylcholine and other cholines	0.00393043	0.00591253	0.506203	0.00598305	0.0059094	0.311316	17028
Phenylalanine	0.00134966	0.00604393	0.823295	-0.00446873	0.006196	0.470769	17283
Polyunsaturated fatty acids	0.00594386	0.00633187	0.347874	0.00510872	0.0063004	0.417448	17114
Pyruvate	0.00373423	0.00978271	0.702671	0.000431011	0.00988362	0.965216	6742
Remnant cholesterol (non-HDL, non-LDL -cholesterol)	0.0113441	0.00628749	0.071194	0.00746203	0.00630525	0.236626	17367
Serum total cholesterol	-0.00103682	0.00612851	0.865655	-0.000121676	0.00609053	0.984061	17367
Serum total triglycerides	0.0188928	0.00641136	0.00321116	0.0111587	0.0065637	0.0891207	17367
Saturated fatty acids	0.0117803	0.00659587	0.074097	0.00820941	0.00660196	0.213691	17058
Total cholesterol in small HDL	-0.0239036	0.00638301	0.000180483	-0.0236295	0.00634637	0.000196631	17370
Cholesterol esters in small HDL	-0.0219121	0.00643509	0.000661409	-0.0215699	0.00640322	0.000755511	17370
Free cholesterol in small HDL	-0.0157098	0.00609663	0.0099718	-0.0158801	0.00607245	0.00891993	17370
Total lipids in small HDL	-0.0214717	0.00643964	0.000855154	-0.021443	0.00788545	0.00654189	17370
Concentration of small HDL particles	-0.020392	0.00645075	0.00157127	-0.0209175	0.00767226	0.00640329	17370
Phospholipids in small HDL	-0.0172863	0.00658618	0.00867426	-0.014503	0.00981701	0.139587	17370
Triglycerides in small HDL	0.0160877	0.00647334	0.0129471	0.0115901	0.00882791	0.189219	17370
Total cholesterol in small LDL	-0.00305679	0.00637428	0.631547	-0.00260094	0.00633841	0.681552	17370
Cholesterol esters in small LDL	-0.00227435	0.00638559	0.721714	-0.00182905	0.00635385	0.77345	17370
Free cholesterol in small LDL	-0.00487873	0.00633577	0.441282	-0.00445414	0.00629005	0.478868	17370
Total lipids in small LDL	-0.00209502	0.00639648	0.743269	-0.0023344	0.00636117	0.713636	17370
Concentration of small LDL particles	-0.00152081	0.00640077	0.812193	-0.00195724	0.00636635	0.758512	17370
Phospholipids in small LDL	-0.0041097	0.00644902	0.523956	-0.00526245	0.00641649	0.412134	17370
Triglycerides in small LDL	0.0134	0.00659446	0.042153	0.0109017	0.00735037	0.138033	17370
Sphingomyelins	0.00155122	0.00558021	0.781023	0.00241469	0.00553592	0.662703	17338
Total cholesterol in small VLDL	0.0123457	0.00611019	0.0433303	0.00699324	0.00617287	0.257257	17370
Cholesterol esters in small VLDL	0.011275	0.00612584	0.0656847	0.00668348	0.00616422	0.278259	17370
Free cholesterol in small VLDL	0.0135107	0.00621076	0.0296026	0.00797124	0.00696526	0.252446	17370
Total lipids in small VLDL	0.0143639	0.00626023	0.021764	0.00720159	0.00647156	0.265792	17370
Concentration of small VLDL particles	0.0166066	0.00649683	0.0105853	0.00969032	0.0067874	0.15338	16566
Phospholipids in small VLDL	0.0114153	0.00634013	0.0717855	0.00437607	0.00646548	0.49851	17370
Triglycerides in small VLDL	0.0157204	0.00637805	0.01371	0.00846955	0.00689334	0.2192	17370
3-hydroxybutyrate	0.000799602	0.00752796	0.91541	0.000584189	0.00747836	0.937735	13006
Total cholines	0.00285306	0.00602118	0.635617	0.00375002	0.00599378	0.531543	17338
Total fatty acids	0.0131351	0.00647837	0.0426086	0.00971363	0.00647422	0.133522	17111
Total phosphoglycerides	0.00911245	0.00679157	0.179684	0.0102537	0.00675717	0.129152	13946
Tyrosine	-0.00143278	0.00619969	0.817233	-0.00965299	0.00639119	0.130952	17366
Estimated degree of unsaturation	-0.00728907	0.00666649	0.274223	-0.00359637	0.00670523	0.591715	16205
Valine	0.0030716	0.00584329	0.599122	-0.00468439	0.00606903	0.440203	17355
Total cholesterol in VLDL	0.0172727	0.00627272	0.00589399	0.0109835	0.00636823	0.0845765	17367
Mean diameter for VLDL particles	0.0179753	0.006196	0.00371839	0.00907059	0.00650978	0.163505	17367
Triglycerides in VLDL	0.017761	0.00633256	0.00503613	0.00937891	0.00651109	0.14974	17367
Total cholesterol in very large HDL	-0.0043713	0.00596072	0.463344	0.000974498	0.00773855	0.899789	17369
Cholesterol esters in very large HDL	-0.00356453	0.00600893	0.553044	0.00070929	0.00840756	0.932767	17369
Free cholesterol in very large HDL	-0.00516471	0.00579141	0.372507	0.00222178	0.005993	0.71084	17369
Total lipids in very large HDL	-0.00448584	0.00575822	0.43596	0.00302119	0.0061738	0.62459	17369
Concentration of very large HDL particles	-0.00435039	0.00576896	0.450787	0.00308848	0.00664387	0.642031	17369
Phospholipids in very large HDL	-0.00481426	0.00571595	0.399648	0.00327783	0.00598584	0.583968	17369
Triglycerides in very large HDL	0.024783	0.00662659	0.000184073	0.025403	0.00778249	0.00109806	17369
Total cholesterol in very large VLDL	0.0187025	0.00652962	0.00417994	0.0123604	0.0069437	0.075061	17344
Cholesterol esters in very large VLDL	0.0191644	0.00652375	0.00330731	0.0130322	0.00717024	0.0691341	17344
Free cholesterol in very large VLDL	0.0177716	0.00654425	0.00661553	0.0112564	0.006708	0.0933356	17344
Total lipids in very large VLDL	0.0176997	0.00648316	0.0063314	0.010429	0.00661082	0.114665	17344
Concentration of very large VLDL particles	0.0181765	0.00666678	0.00640242	0.0110919	0.00677927	0.101808	16540
Phospholipids in very large VLDL	0.0162142	0.00654026	0.0131701	0.00955241	0.00664642	0.150654	17344
Triglycerides in very large VLDL	0.0169325	0.0064799	0.00897326	0.0096152	0.00660632	0.145543	17344
Total cholesterol in very small VLDL	0.00431263	0.00613609	0.482162	0.00299254	0.00609966	0.623704	17369
Cholesterol esters in very small VLDL	0.00476719	0.00623162	0.444271	0.00312614	0.00620163	0.614203	17369
Free cholesterol in very small VLDL	0.00417404	0.00598518	0.485555	0.0037982	0.00594474	0.522877	17369
Total lipids in very small VLDL	0.00861148	0.0062156	0.165911	0.00590896	0.00620578	0.34101	17369
Concentration of very small VLDL particles	0.0118819	0.00642506	0.0644128	0.00866488	0.00642386	0.177382	16565
Phospholipids in very small VLDL	0.00565686	0.00630634	0.369713	0.00466547	0.00627542	0.457208	17369
Triglycerides in very small VLDL	0.0172346	0.00647613	0.00778503	0.0112252	0.00656289	0.0871895	17369
Total cholesterol in chylomicrons and extremely large VLDL	0.0193231	0.00657906	0.00331334	0.0131631	0.00666735	0.0483519	17324
Cholesterol esters in chylomicrons and extremely large VLDL	0.0199442	0.00660393	0.0025273	0.0142591	0.00667913	0.0327711	17324
Free cholesterol in chylomicrons and extremely large VLDL	0.0179606	0.00655134	0.00611569	0.0114075	0.0066492	0.0862311	17324
Total lipids in chylomicrons and extremely large VLDL	0.0183672	0.00653389	0.00493776	0.0115735	0.00664253	0.0814514	17324
Concentration of chylomicrons and extremely large VLDL particles	0.0194725	0.00670326	0.00367326	0.0126233	0.00680723	0.0636817	16520
Phospholipids in chylomicrons and extremely large VLDL	0.0164392	0.00655119	0.0120953	0.00972705	0.00665193	0.143662	17324
Triglycerides in chylomicrons and extremely large VLDL	0.0180679	0.00652894	0.00565132	0.0112326	0.00663813	0.0906195	17324

## Sheet: Table S10
Table S10: Mendelian Randomization results for total sleep duration
	Inverse-Variance Weighted			Weighted-Median Estimator			MR-Egger			MR-Egger intercept	MAGNETIC Q	NEO Q	OBB Q	PROSPER Q
	beta	se	pval	beta	se	pval	beta	se	pval	pval	pval	pval	pval	pval
Acetoacetate	0.10102	0.0809823	0.21224	0.011859	0.117557	0.919647	-0.250299	0.300734	0.405243	0.226122	0.798425		0.117211	0.500614
Acetate	-0.0578691	0.0698106	0.407136	-0.173395	0.106517	0.103554	-0.452716	0.256676	0.0777716	0.108986	0.636687	0.301334	0.182947	0.56083
Alanine	0.0996579	0.0732527	0.173682	0.185556	0.108315	0.0866908	0.625138	0.267268	0.0193356	0.0407602	0.160936	0.743443	0.139821	0.782521
Albumin	-0.0116097	0.0744811	0.876132	-0.0753323	0.105205	0.473959	-0.268573	0.274866	0.328517	0.33086	0.918672	0.777869	0.266948	0.176834
Apolipoprotein A-I	-0.0527453	0.0918836	0.565938	-0.00124672	0.114893	0.991342	0.117895	0.341907	0.730232	0.60378	0.00208452	0.00291799	0.00690599	0.00308487
Apolipoprotein B	0.0444127	0.0742094	0.549521	-0.0578388	0.109645	0.59784	-0.0917536	0.275373	0.738985	0.615835	0.360991	0.00358598	0.403394	0.908014
3-hydroxybutyrate	0.0380918	0.0695988	0.584169	-0.00589915	0.10191	0.953839	-0.343433	0.25479	0.17769	0.118453	0.462361	0.419237	0.686177	0.448213
Citrate	0.0526312	0.0696183	0.449651	-0.0602408	0.100483	0.548832	-0.088896	0.256556	0.728969	0.558602	0.474565	0.993984	0.245145	0.103103
Creatinine	0.1521	0.0691701	0.0278827	0.13206	0.0982933	0.179102	-0.0811917	0.254543	0.749749	0.333425	0.108531	0.981235	0.891205	0.28107
22:6, docosahexaenoic acid	0.00467968	0.121468	0.969268	0.132978	0.123741	0.282531	0.723585	0.444707	0.103715	0.092911	5.47429e-10	0.00452657	5.54369e-12	0.000156674
Esterified cholesterol	-0.0240228	0.09285	0.795846	0.0257559	0.123873	0.83529	0.0330653	0.341131	0.922783	0.855719	0.00200482	0.0869286	0.186069	0.365583
Estimated description of fatty acid chain length, not actual carbon number	-0.147797	0.104672	0.157952	-0.149475	0.144906	0.302293	-0.103513	0.388749	0.79003	0.90577	0.0316624	0.337564		0.902389
Omega-3 fatty acids	0.0243493	0.13639	0.858309	0.154862	0.119634	0.195507	0.760523	0.499477	0.12785	0.125677	1.90217e-15	1.30311e-05	3.0866e-21	2.41831e-05
Omega-6 fatty acids	0.0799051	0.0823647	0.331978	0.00792845	0.122049	0.948205	0.304773	0.304254	0.316485	0.437585	0.87456	0.247387	0.208788	0.829557
Free cholesterol	-0.0383661	0.0847362	0.650714	0.0359992	0.120634	0.765385	-0.0729942	0.311241	0.814576	0.916551	0.290113	0.064211	0.205216	0.805629
Glucose	0.02093	0.0762251	0.783637	0.0820507	0.106305	0.440207	0.220072	0.278854	0.429993	0.455433	0.0120216	0.263891	0.522581	0.488725
Glutamine	-0.00481465	0.0686512	0.944089	-0.0270386	0.0989692	0.784698	0.146079	0.254205	0.565527	0.536021	0.421378	0.515378	0.899575	0.467112
Glycerol	-0.00125441	0.0856089	0.988309	0.040193	0.128613	0.754651	0.244098	0.317196	0.441567	0.421767	0.4154		0.123554
Glycine	0.11915	0.0869001	0.170339	0.16782	0.12755	0.188269	0.400622	0.321731	0.213056	0.361806	0.788925		0.0520256
Glycoprotein acetyls, mainly a1-acid glycoprotein	0.0975989	0.0780587	0.21118	0.00730239	0.111183	0.947633	0.0759577	0.289746	0.793204	0.942893	0.531614	0.00747021	0.00750145	0.111074
Total cholesterol in HDL	-0.0968887	0.0891905	0.277341	0.0262715	0.112017	0.814573	0.226711	0.3289	0.490635	0.305665	0.00459647	4.04263e-06	0.00101695	0.00711674
Mean diameter for HDL particles	-0.100633	0.102286	0.325194	0.0630651	0.109923	0.566157	0.120418	0.376344	0.748993	0.540314	6.14134e-06	4.15084e-07	1.59732e-07	0.00210453
Histidine	0.0387771	0.0745692	0.603053	0.00641471	0.108637	0.952915	0.242312	0.276377	0.380625	0.447904	0.47611	0.667854	0.0775046	0.632843
Total cholesterol in IDL	-0.0874142	0.0822004	0.287588	-0.056688	0.113764	0.618278	-0.120094	0.304162	0.692965	0.915307	0.0224003	0.107194	0.202369	0.790323
Free cholesterol in IDL	-0.0667914	0.078505	0.394885	-0.0554738	0.111289	0.618155	-0.197608	0.290802	0.496803	0.643725	0.0876607	0.121129	0.168051	0.693116
Total lipids in IDL	-0.0713703	0.0816349	0.381975	-0.062903	0.112571	0.576308	-0.153699	0.302101	0.610916	0.781331	0.0279093	0.120389	0.233324	0.846316
Concentration of IDL particles	-0.0632055	0.0812687	0.436725	-0.0424534	0.113346	0.707997	-0.161982	0.300877	0.590325	0.736935	0.0345272	0.113727	0.241493	0.846922
Phospholipids in IDL	-0.0642343	0.0766009	0.401717	-0.0850943	0.10775	0.429681	-0.24562	0.284183	0.387421	0.511785	0.142457	0.114095	0.292257	0.841571
Triglycerides in IDL	-0.00346821	0.0783799	0.964706	0.0649691	0.11109	0.558661	0.0103759	0.288911	0.971351	0.962091	0.0796763	0.310201	0.524129	0.30316
Isoleucine	0.215659	0.0695333	0.00192534	0.10976	0.101201	0.278112	0.0997029	0.256901	0.697943	0.64328	0.569661	2.30632e-05	0.0814561	0.661006
Total cholesterol in large HDL	-0.0860123	0.0920361	0.35002	0.0508577	0.111777	0.649114	0.294589	0.33818	0.383699	0.241467	0.001237	8.71564e-08	4.66109e-05	0.0213261
Cholesterol esters in large HDL	-0.0851187	0.0940067	0.365225	0.0640957	0.11137	0.564939	0.239939	0.347018	0.489295	0.330239	0.00121143	1.24613e-07	6.08976e-05	0.0214844
Free cholesterol in large HDL	-0.0988853	0.0936085	0.290799	0.0704495	0.106687	0.509038	0.32084	0.343363	0.350095	0.203294	0.000373369	2.67686e-08	3.10225e-05	0.0291223
Total lipids in large HDL	-0.120244	0.0955453	0.208211	0.0299277	0.111211	0.787848	0.187629	0.352856	0.594904	0.365029	0.00035955	2.86029e-07	3.18047e-05	0.0264623
Concentration of large HDL particles	-0.125292	0.0961053	0.192337	0.044949	0.110102	0.683091	0.175599	0.355026	0.620876	0.379172	0.000226282	3.56257e-07	2.87052e-05	0.0246039
Phospholipids in large HDL	-0.137079	0.0940606	0.145022	-0.0135414	0.114231	0.905636	0.121426	0.348106	0.727226	0.440723	0.000722085	6.68708e-07	7.06046e-05	0.0614706
Total cholesterol in large LDL	-0.0212106	0.0725953	0.770152	-0.0689438	0.106942	0.51913	-0.178779	0.269334	0.50683	0.550283	0.371558	0.143198	0.481627	0.913722
Cholesterol esters in large LDL	-0.0367436	0.0766778	0.6318	-0.0749365	0.111123	0.500084	-0.195008	0.284143	0.492522	0.568738	0.172751	0.124384	0.483229	0.913826
Free cholesterol in large LDL	-0.0424595	0.0744919	0.568686	-0.0439652	0.107688	0.683079	-0.221744	0.276335	0.422296	0.50581	0.23884	0.145915	0.422252	0.867131
Total lipids in large LDL	-0.0422601	0.0771579	0.583891	-0.0851165	0.112846	0.450685	-0.213389	0.285872	0.455396	0.539202	0.146977	0.136546	0.4729	0.913784
Concentration of large LDL particles	-0.0398783	0.0773402	0.606119	-0.0823844	0.10971	0.452696	-0.199691	0.286497	0.485798	0.56751	0.136059	0.137714	0.468407	0.903595
Phospholipids in large LDL	-0.0393661	0.0728348	0.588863	-0.0595712	0.1079	0.580881	-0.185895	0.270472	0.491894	0.579271	0.37	0.117909	0.462012	0.914105
Total cholesterol in large VLDL	0.12905	0.0780825	0.0983839	0.18532	0.106838	0.0828134	0.165962	0.289328	0.566231	0.886953	0.157822	0.000324449	0.138125	0.613585
Cholesterol esters in large VLDL	0.0816791	0.0822635	0.320761	0.12549	0.110057	0.254192	0.209817	0.303916	0.489956	0.656572	0.0366259	0.000253737	0.242307	0.652958
Free cholesterol in large VLDL	0.141311	0.0793637	0.0749856	0.178156	0.105366	0.0908683	0.184677	0.294811	0.531036	0.869265	0.109425	0.000398848	0.0741191	0.542835
Total lipids in large VLDL	0.111373	0.0821357	0.175112	0.134556	0.108669	0.215635	0.250817	0.304453	0.410037	0.62895	0.0781944	0.000269779	0.0640546	0.520772
Concentration of large VLDL particles	0.0827433	0.0834757	0.321575	0.0883814	0.108516	0.415385	0.238351	0.309202	0.44079	0.597931	0.0424922	0.000247639	0.0609046	0.508474
Phospholipids in large VLDL	0.110058	0.0813766	0.176231	0.0995545	0.106901	0.35171	0.168759	0.301399	0.575535	0.833871	0.0524944	0.000488529	0.0577626	0.602958
Triglycerides in large VLDL	0.127298	0.0809702	0.115913	0.145539	0.107202	0.174585	0.208554	0.300648	0.487882	0.772801	0.0660197	0.000188278	0.0512625	0.45236
18:2, linoleic acid	0.186789	0.108954	0.0864576	0.0911226	0.124438	0.464003	-0.36895	0.399347	0.355548	0.149247	1.27619e-15	0.00250756	0.0756603	0.37491
Lactate	0.047015	0.0744601	0.527771	0.125837	0.110852	0.2563	0.520731	0.27077	0.0544613	0.0685893	0.246669	0.0517867	0.0157595	0.376582
Total cholesterol in LDL	0.00730001	0.0721996	0.919464	-0.0355184	0.108748	0.743961	-0.237585	0.267798	0.374983	0.347661	0.396592	0.157926	0.62555	0.941029
Mean diameter for LDL particles	-0.151106	0.0844526	0.0735771	-0.203373	0.111105	0.0671802	-0.0330183	0.312773	0.915926	0.696239	0.00476509	0.338508	0.0608253	0.510865
Leucine	0.123981	0.067555	0.066468	0.163441	0.100188	0.102818	-0.0112505	0.249279	0.964002	0.571314	0.497453	0.000564234	0.446235	0.397741
Total cholesterol in medium HDL	-0.0765574	0.0732319	0.295833	-0.0803482	0.107223	0.453645	0.0380126	0.272453	0.889039	0.6609	0.510249	0.0255869	0.271596	0.34467
Cholesterol esters in medium HDL	-0.063216	0.0749454	0.398952	-0.0930373	0.112306	0.407429	-0.0230978	0.277461	0.933655	0.879581	0.782999	0.0288482	0.301056	0.318968
Free cholesterol in medium HDL	-0.122156	0.0735866	0.0969088	-0.0719413	0.111084	0.517224	0.0910042	0.273566	0.739391	0.418181	0.470519	0.0192032	0.157541	0.452713
Total lipids in medium HDL	-0.11125	0.0747188	0.136508	-0.129912	0.108932	0.233026	-0.0293311	0.276817	0.915616	0.758821	0.782023	0.0350695	0.287356	0.418726
Concentration of medium HDL particles	-0.120237	0.0746356	0.107181	-0.170982	0.111211	0.124181	-0.0266121	0.276458	0.923314	0.725681	0.711623	0.0416432	0.296779	0.439315
Phospholipids in medium HDL	-0.127352	0.0728632	0.0804936	-0.159813	0.110042	0.146421	0.0380103	0.269846	0.887981	0.524559	0.51152	0.0267779	0.27457	0.442959
Total cholesterol in medium LDL	0.0111111	0.0720548	0.87745	-0.0235871	0.108944	0.828593	-0.225632	0.267253	0.398522	0.362789	0.407829	0.176053	0.738159	0.956256
Cholesterol esters in medium LDL	-0.0113766	0.0759543	0.880937	-0.0446105	0.110154	0.68549	-0.19299	0.28152	0.493011	0.507995	0.210898	0.177315	0.692687	0.948797
Total lipids in medium LDL	-0.0131467	0.0749623	0.860783	-0.0620263	0.109233	0.570146	-0.17272	0.278085	0.53453	0.557144	0.305345	0.16362	0.834983	0.955154
Concentration of medium LDL particles	-0.00708761	0.0746291	0.924338	-0.071429	0.111473	0.521669	-0.190957	0.276842	0.49034	0.495505	0.326905	0.169488	0.714214	0.948996
Phospholipids in medium LDL	0.00606905	0.0722634	0.933068	-0.0820997	0.104075	0.430197	-0.236049	0.268042	0.378511	0.352615	0.384673	0.173292	0.691002	0.965615
Total cholesterol in medium VLDL	0.0707211	0.0743041	0.341209	0.0386784	0.105877	0.714877	0.212641	0.274909	0.439229	0.584955	0.324408	4.68112e-05	0.367568	0.613932
Cholesterol esters in medium VLDL	0.0410047	0.0751556	0.585343	0.0286447	0.110804	0.796009	0.313975	0.275724	0.254815	0.300123	0.397236	0.000158944	0.411287	0.570271
Free cholesterol in medium VLDL	0.0910998	0.078732	0.247237	0.0783186	0.104629	0.454137	0.195006	0.291744	0.503868	0.705538	0.115424	9.83211e-06	0.163956	0.533864
Total lipids in medium VLDL	0.0931926	0.0823141	0.257568	0.0272924	0.11051	0.804932	0.278727	0.303804	0.358904	0.521254	0.038163	4.93594e-06	0.170415	0.599125
Concentration of medium VLDL particles	0.0938989	0.0813241	0.248244	0.0947584	0.111541	0.395582	0.19734	0.301375	0.512597	0.716757	0.0732868	3.94263e-06	0.149853	0.583726
Phospholipids in medium VLDL	0.0813865	0.0782568	0.298344	0.0529093	0.109223	0.628091	0.153246	0.290357	0.597647	0.793449	0.135809	8.23893e-06	0.158937	0.698449
Triglycerides in medium VLDL	0.100063	0.081057	0.217025	0.119521	0.106312	0.260908	0.14934	0.30095	0.619733	0.861865	0.0579236	1.40584e-06	0.0735639	0.492777
Monounsaturated fatty acids; 16:1, 18:1	0.11627	0.0875558	0.184194	0.0829582	0.122764	0.499195	0.436103	0.319476	0.172234	0.294229	0.142182	0.0117887	0.208198	0.371013
Polyunsaturated fatty acids	0.0410697	0.11869	0.729324	0.120692	0.122462	0.324354	-0.0431246	0.43348	0.920754	0.841069	5.78443e-187	0.101483	0.0666605	0.607845
Phosphatidylcholine and other cholines	0.0537259	0.0847411	0.526081	0.0025201	0.122936	0.983645	0.165105	0.313315	0.59822	0.705365	0.604696	0.0752048	0.0565697	0.259909
Phenylalanine	0.0100568	0.076649	0.895612	-0.122564	0.106794	0.251104	-0.155736	0.281679	0.580341	0.539334	0.0419898	0.332369	0.768435	0.206532
Pyruvate	0.041983	0.074159	0.571312	0.128255	0.112493	0.254237	0.184976	0.273544	0.4989	0.5823	0.549712		0.718135	0.00201998
Total lipids in small HDL	-0.0344707	0.0750244	0.645904	-0.184863	0.109446	0.0912055	-0.076881	0.276835	0.781232	0.870667	0.523843	0.0390366	0.395442	0.424168
Concentration of small HDL particles	-0.0250436	0.0752808	0.739384	-0.182637	0.106196	0.0854673	-0.0787455	0.278247	0.777173	0.839253	0.450906	0.0319297	0.353998	0.34173
Triglycerides in small HDL	-0.0476361	0.0776113	0.539362	-0.0668652	0.115657	0.563173	0.26792	0.288213	0.352583	0.257768	0.179672	0.0199616	0.365714	0.0705379
Total cholesterol in small LDL	0.0318344	0.0741834	0.667828	-0.0318056	0.107686	0.767722	-0.137998	0.274972	0.615764	0.530141	0.212404	0.178793	0.801938	0.958968
Total lipids in small LDL	0.0220282	0.0734387	0.764212	-0.044871	0.110471	0.68461	-0.134923	0.272619	0.620661	0.557395	0.444285	0.152051	0.79551	0.959816
Concentration of small LDL particles	0.0245361	0.0737253	0.739282	-0.0441316	0.109081	0.685789	-0.125472	0.273643	0.646577	0.576404	0.41883	0.145516	0.779165	0.963403
Total cholesterol in small VLDL	0.0471978	0.0720674	0.512525	0.049926	0.107924	0.643648	0.16479	0.26627	0.535994	0.642629	0.646276	0.000441399	0.475262	0.70203
Free cholesterol in small VLDL	0.0859438	0.0722941	0.234515	0.103338	0.106551	0.332123	0.25505	0.267014	0.33948	0.508221	0.57304	0.00011406	0.460659	0.66453
Total lipids in small VLDL	0.0824088	0.0757411	0.276581	0.0422014	0.109369	0.699597	0.26698	0.279365	0.339241	0.489703	0.302183	3.31687e-05	0.430456	0.725734
Concentration of small VLDL particles	0.0870649	0.0762848	0.253739	0.0529647	0.109889	0.629819	0.255327	0.28178	0.364871	0.532363	0.2772	2.19415e-05	0.384514	0.712876
Phospholipids in small VLDL	0.0779202	0.0737943	0.291009	0.119425	0.105765	0.258834	0.252862	0.272886	0.354122	0.504577	0.315779	7.11263e-05	0.471056	0.823549
Triglycerides in small VLDL	0.116402	0.0775632	0.133423	0.118407	0.107004	0.268484	0.179803	0.287516	0.531729	0.817658	0.172752	3.80046e-06	0.162965	0.532343
Serum total cholesterol	-0.0464077	0.0795225	0.559503	-0.00803091	0.110495	0.94206	-0.0340643	0.294621	0.907953	0.959379	0.0439167	0.087175	0.234863	0.509166
Serum total triglycerides	0.0840032	0.076911	0.274739	0.0411481	0.107953	0.703079	0.155437	0.284905	0.585358	0.789908	0.195234	0.000192008	0.175924	0.699628
Sphingomyelins	0.111778	0.0893401	0.210881	0.125528	0.126035	0.319264	-0.257434	0.329775	0.435016	0.251006	0.119338	0.0298184	0.0975793	0.124794
Total fatty acids	0.103818	0.0823857	0.207618	0.113072	0.119196	0.342812	0.505525	0.304185	0.096533	0.16491	0.864321	0.0987036	0.254043	0.743224
Total phosphoglycerides	0.0777754	0.0832307	0.350069	0.024532	0.121935	0.84055	0.20154	0.307261	0.511873	0.665908	0.7599	0.31285	0.0737935	0.296245
Tyrosine	0.0223034	0.0708149	0.752797	0.000485615	0.104546	0.996294	0.160792	0.261122	0.538044	0.575312	0.175494	0.634638	0.932103	0.667113
Valine	0.147033	0.0669462	0.0280714	0.200114	0.0984976	0.0421879	0.0252623	0.24643	0.918349	0.601129	0.581906	0.115622	0.721487	0.942583
Mean diameter for VLDL particles	0.120165	0.0954934	0.208261	0.0580092	0.108403	0.592562	0.0693106	0.354203	0.84486	0.884354	4.51853e-06	5.61777e-07	0.0121801	0.350065
Total cholesterol in very large HDL	-0.0883017	0.0975599	0.365411	0.00309139	0.112354	0.978049	0.176467	0.360555	0.624535	0.443344	1.17702e-05	0.000206058	0.000159076	3.18148e-05
Cholesterol esters in very large HDL	-0.0981	0.0986194	0.319866	-0.00187681	0.117097	0.987212	0.108889	0.36486	0.765367	0.554956	3.45498e-05	0.000227351	0.000646721	1.4393e-05
Free cholesterol in very large HDL	-0.105036	0.0986593	0.287042	0.0676593	0.106023	0.523371	0.333771	0.361344	0.355646	0.205063	3.92785e-06	0.000111414	8.92998e-06	0.00122337
Total lipids in very large HDL	-0.113103	0.101569	0.265468	0.128981	0.108998	0.236678	0.267892	0.373428	0.473136	0.287928	9.8021e-06	5.49536e-06	2.99477e-06	0.000125114
Concentration of very large HDL particles	-0.103496	0.100052	0.300935	0.0875103	0.109677	0.424936	0.253882	0.368481	0.490826	0.311815	4.35043e-05	5.12608e-06	2.40057e-06	0.000112986
Phospholipids in very large HDL	-0.114658	0.101096	0.256732	0.0798978	0.106377	0.452604	0.275231	0.370849	0.457987	0.272862	1.11813e-05	1.5194e-07	3.51022e-07	0.00603329
Triglycerides in very large HDL	-0.0522476	0.0826818	0.527445	0.00946806	0.104334	0.927693	0.247291	0.303264	0.414825	0.303832	0.00211229	0.202561	0.541929	0.129712
Total lipids in very large VLDL	0.138096	0.0805852	0.0865898	0.164628	0.112301	0.142662	0.185126	0.298747	0.535471	0.861253	0.128809	0.00231214	0.102982	0.516951
Concentration of very large VLDL particles	0.075007	0.082943	0.365826	0.136716	0.110515	0.216058	0.23381	0.304826	0.443065	0.584849	0.0648802	0.0021518	0.0997716	0.496012
Phospholipids in very large VLDL	0.137023	0.0776942	0.0777965	0.17488	0.110636	0.113951	0.15449	0.288556	0.592381	0.940114	0.177911	0.00649656	0.115968	0.624236
Triglycerides in very large VLDL	0.13956	0.0813721	0.08633	0.128389	0.110639	0.245871	0.164653	0.301538	0.585037	0.922428	0.045247	0.00156037	0.080937	0.408573
Total lipids in very small VLDL	-0.0512258	0.0799757	0.521837	0.0805632	0.111884	0.471489	0.0905612	0.29473	0.758639	0.615891	0.106003	0.0192299	0.175636	0.746341
Concentration of very small VLDL particles	-0.0414774	0.078716	0.598246	0.0403717	0.114434	0.724242	0.0977145	0.289347	0.735584	0.616052	0.174004	0.0151194	0.231447	0.758748
Phospholipids in very small VLDL	-0.0728711	0.0826892	0.378174	0.0236845	0.111243	0.831399	0.0315566	0.304675	0.917507	0.719719	0.0207516	0.0591486	0.186466	0.781819
Triglycerides in very small VLDL	0.0430908	0.0750996	0.566115	-0.00967118	0.108655	0.929076	0.170128	0.27804	0.540615	0.637514	0.541669	0.00124156	0.260665	0.605475
Total lipids in chylomicrons and extremely large VLDL	0.107575	0.0791522	0.174119	0.129293	0.115614	0.263432	0.0611969	0.293952	0.835083	0.882152	0.191827	0.00143099	0.191473	0.549172
Concentration of chylomicrons and extremely large VLDL particles	0.0250769	0.0795229	0.752502	-0.00890966	0.116861	0.939227	-0.0531337	0.294262	0.856708	0.786062	0.205291	0.00128707	0.183265	0.557762
Phospholipids in chylomicrons and extremely large VLDL	0.0946836	0.079386	0.232987	0.0759046	0.113484	0.503586	0.0176654	0.294463	0.952162	0.794597	0.0682692	0.00196865	0.197653	0.570405
Triglycerides in chylomicrons and extremely large VLDL	0.063691	0.0818185	0.436308	0.110587	0.113433	0.329605	0.0511046	0.302509	0.865847	0.973509	0.027903	0.000839033	0.133613	0.560327

[truncated: 6 more sheets: Table S11, Table S12, Table S13, Table S14, Table S15, Table S16]
